# Supplementary material for: The Rh(iii)-catalysed C–H/N–H annulation of 2-thienyl- and 2-phenyl-quinazolin-4(3H)-ones with diphenylacetylene
Source: Royal Society of Chemistry journal article supplement (doi:10.1039/d1nj00935d), 2021-01-01
Supplement: d1nj00935d1.pdf [file d1nj00935d1.pdf]

**Rh(III)-Catalyzed C-H/N-H Annulation of 2-Thienyl- and 2-Phenyl-  
Quinazolin-4(3*H*)-ones with Diphenylacetylene**

Tatyana N. Moshkina, Emiliya V. Nosova, Galina N. Lipunova, Ekaterina F. Zhilina,  
Pavel A. Slepukhin, Igor L. Nikonov and Valery N. Charushin

**Contents**

|                                                                                                                   |    |
|-------------------------------------------------------------------------------------------------------------------|----|
| 1. NMR and mass spectra of intermediates .....                                                                    | 2  |
| 2. NMR and mass spectra of products <b>5</b> and <b>7</b> .....                                                   | 7  |
| 3. UV/Vis, fluorescence excitation and fluorescence emission spectra of compounds<br><b>5a-e</b> , <b>7</b> ..... | 24 |
| 4. Aggregation-induced emission of compounds <b>5a-f</b> , <b>7</b> , <b>8</b> .....                              | 33 |
| 5. Fe <sup>3+</sup> cation detection of compounds <b>5a-d,f</b> and <b>7</b> .....                                | 36 |
| 6. Selected bond lengths and angles of compounds <b>5a,b</b> , and <b>7</b> .....                                 | 39 |
| 7. References .....                                                                                               | 46 |

# 1. NMR and mass spectra of intermediates

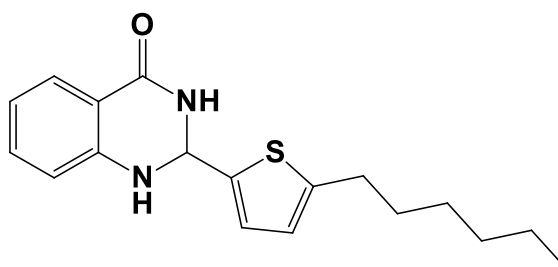

3c

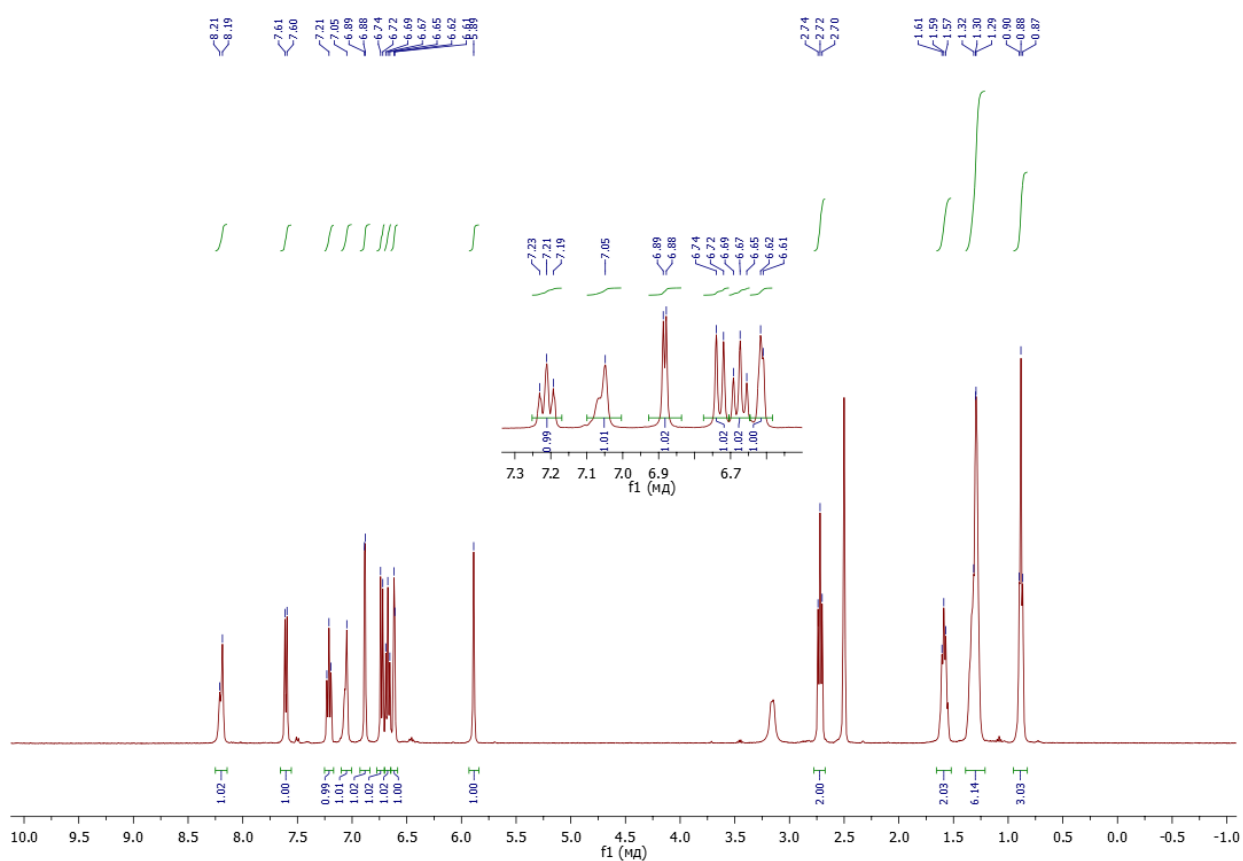

a

Line#:1 R.Time:2.135(Scan#:835)  
MassPeaks:77  
RawMode:Single 2.135(835) BasePeak:313(5850536)  
Фон.реж.:0.940(357) Group 1 - Event 1

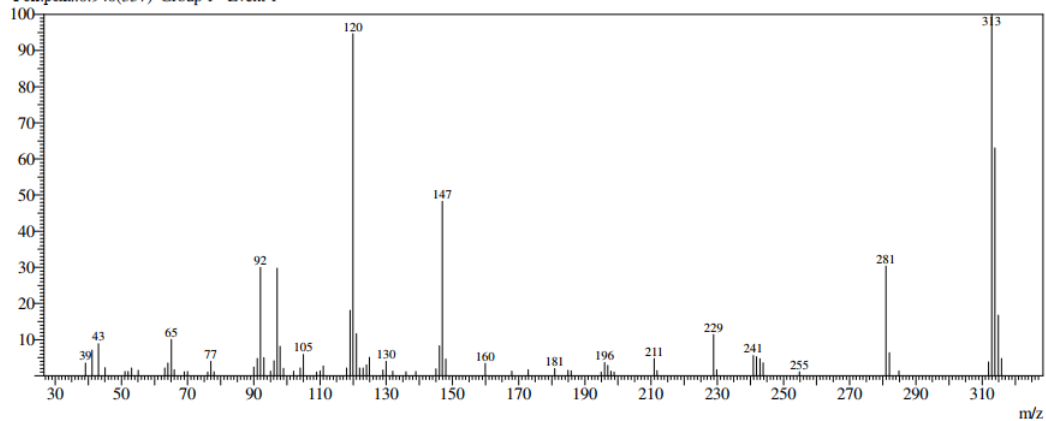

b

Figure S1. NMR  $^1\text{H}$  (a) in  $\text{DMSO-d}_6$  and mass spectrum (EI) (b) of **3c**.

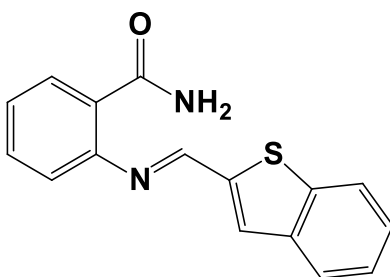

**3d**

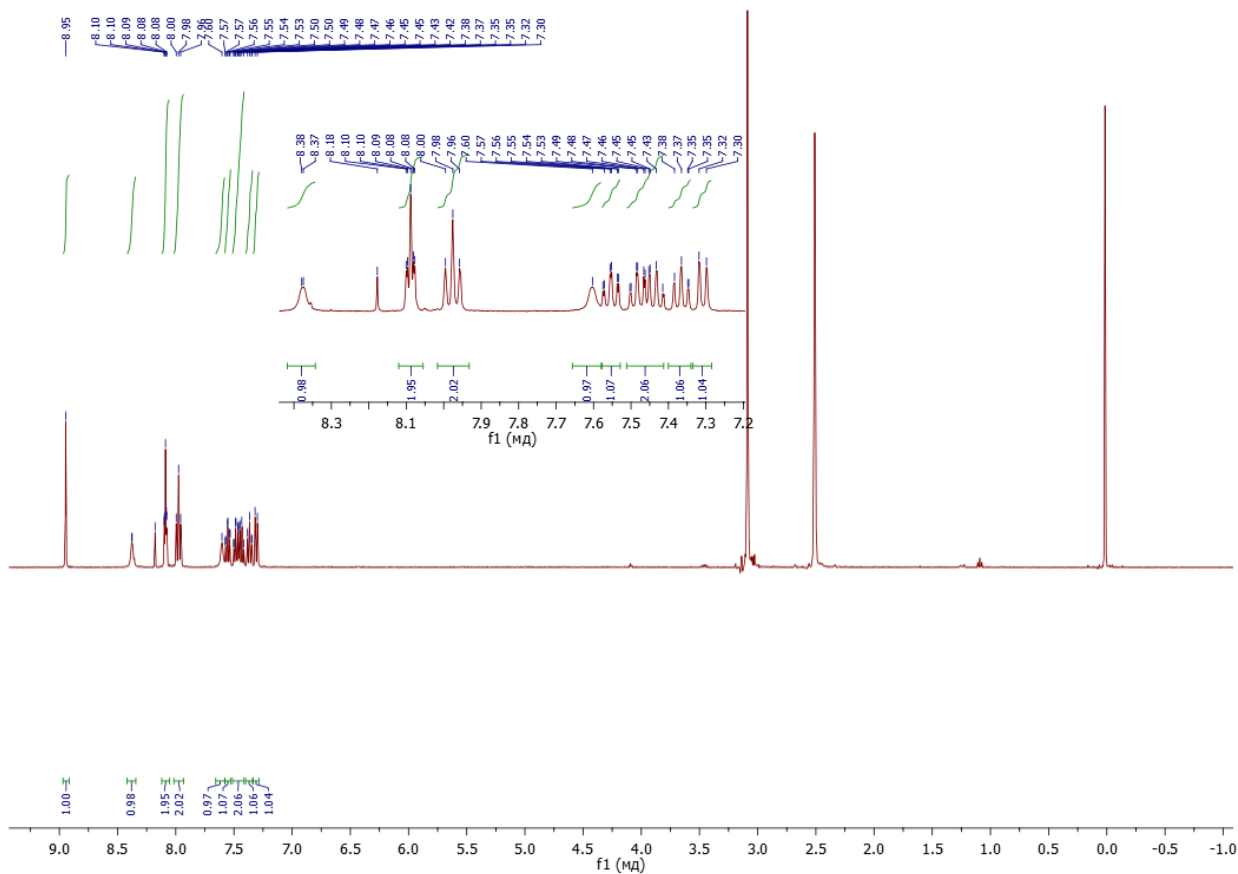

a

Line#:1 R.Time:3.487(Scan#:1376)

MassPeaks:82

RawMode:Single 3.487(1376) BasePeak:120(2911360)

Фон.реж.:4.447(1760) Group 1 - Event 1

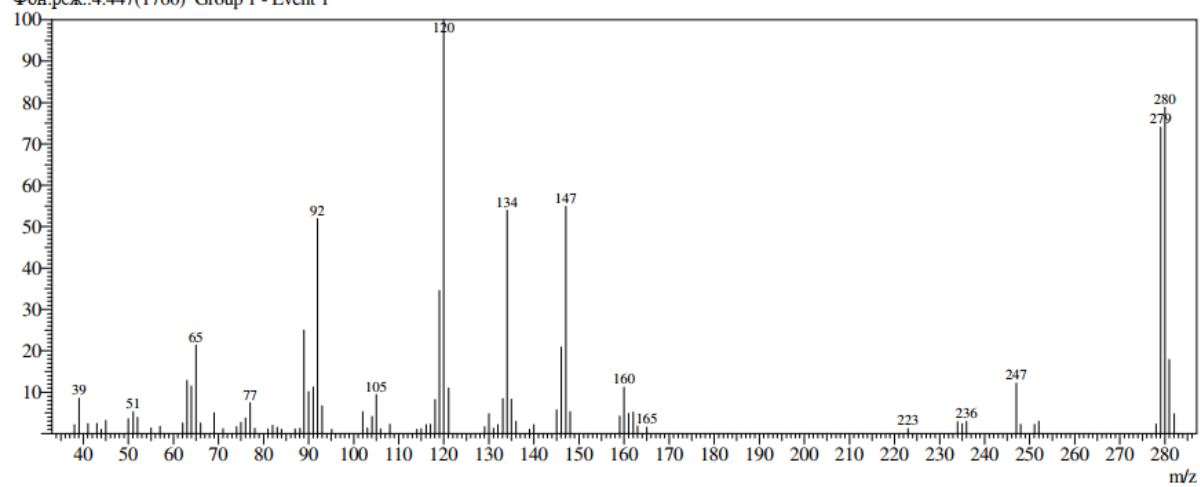

b

Figure S2. NMR  $^1\text{H}$  (a) in  $\text{DMSO-d}_6$  and mass spectrum (EI) (b) of **3d**.

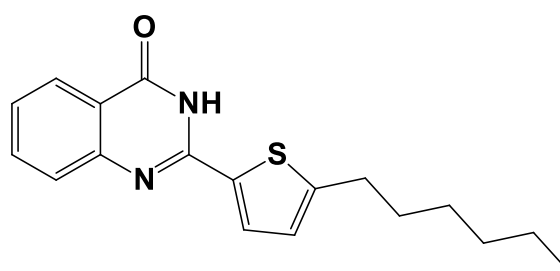

**4c**

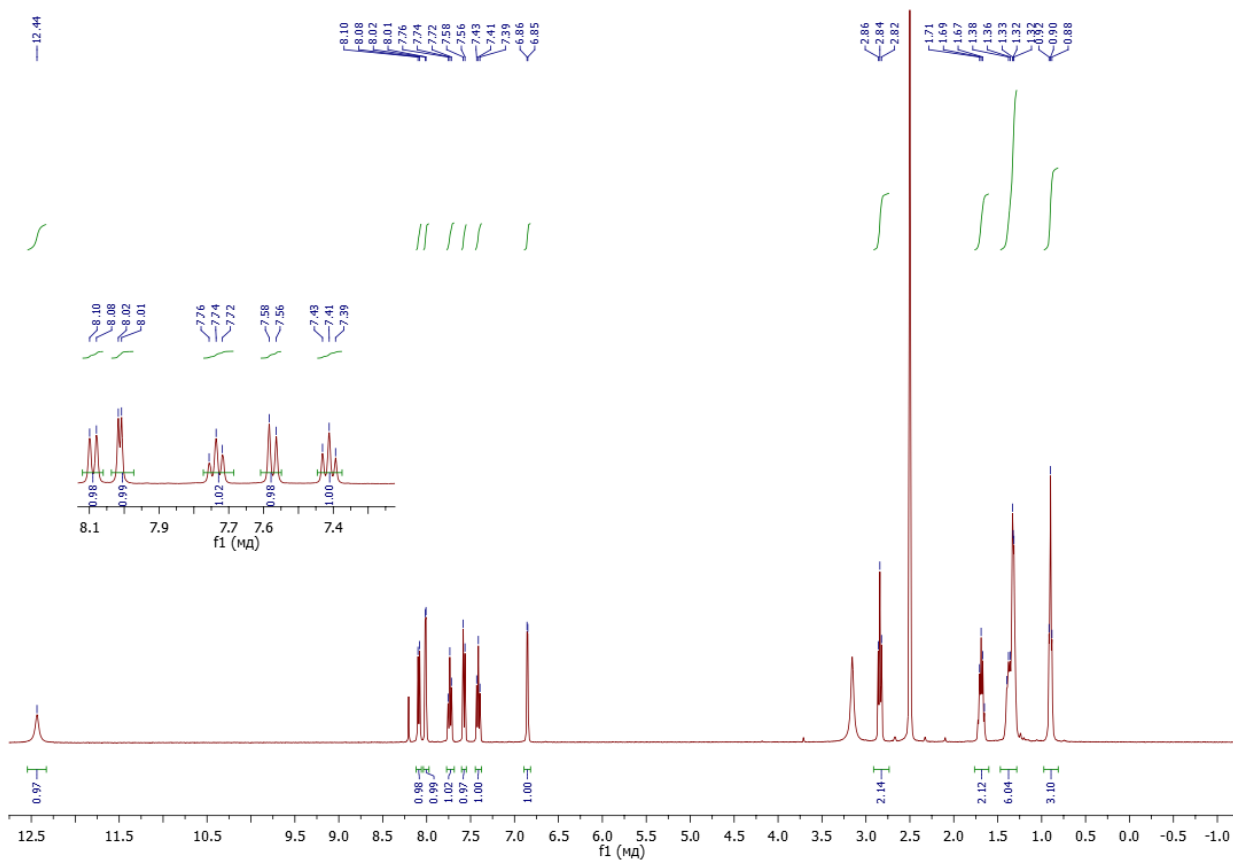

a

Line#:1 R.Time:1.763(Scan#:686)  
 MassPeaks:56  
 RawMode:Single 1.763(686) BasePeak:241(6246162)  
 Фон.реж.:0.848(320) Group 1 - Event 1

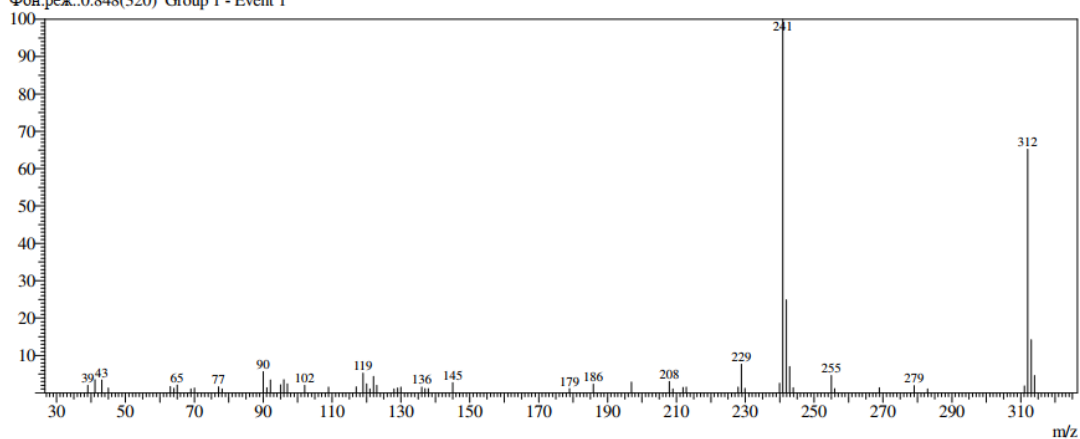

b

Figure S3. NMR  $^1\text{H}$  (a) in  $\text{DMSO-d}_6$  and mass spectrum (EI) (b) of **4c**.

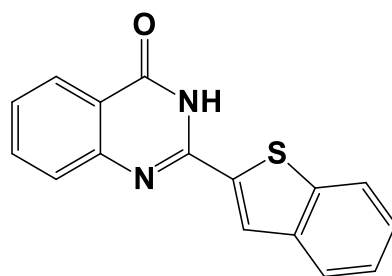

4d

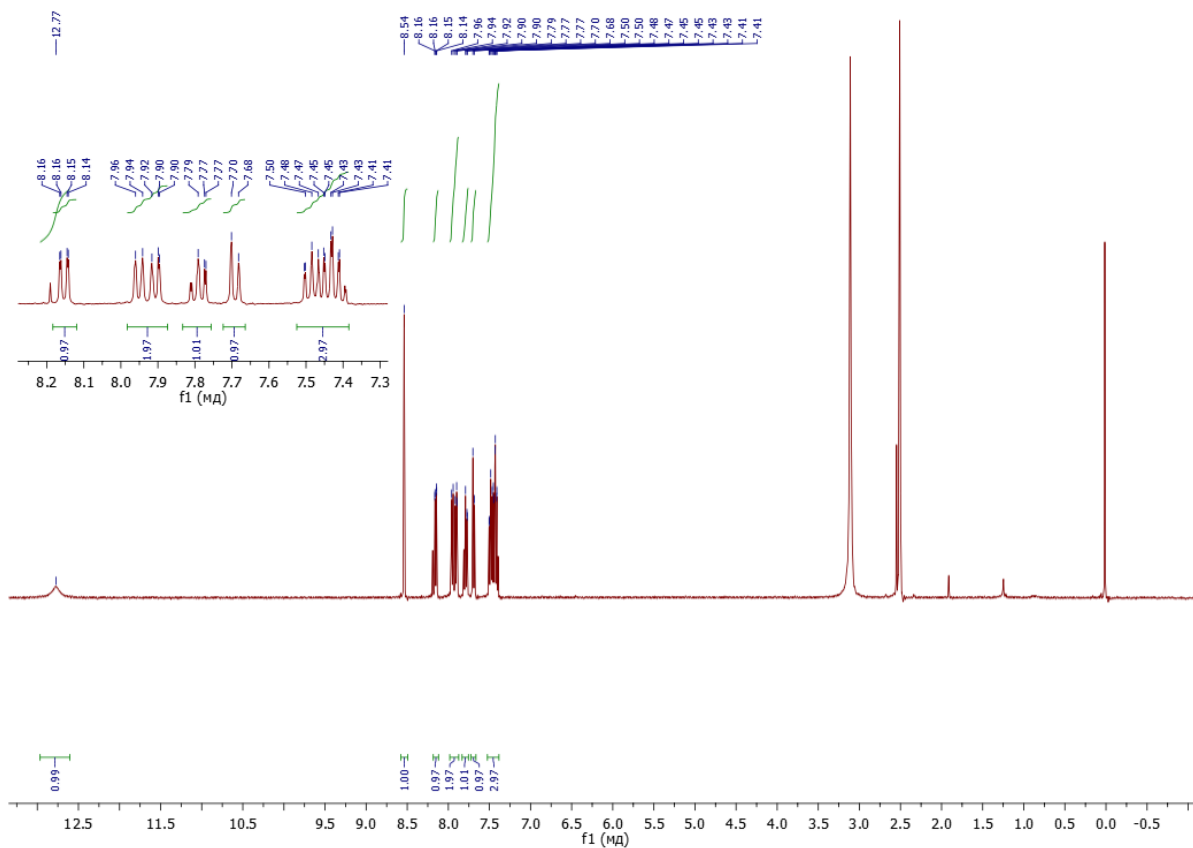

a

Line#:1 R.Time:5.537(Scan#:2196)  
 MassPeaks:93  
 RawMode:Single 5.537(2196) BasePeak:91(389431)  
 Фон.реж.:2.487(976) Group 1 - Event 1

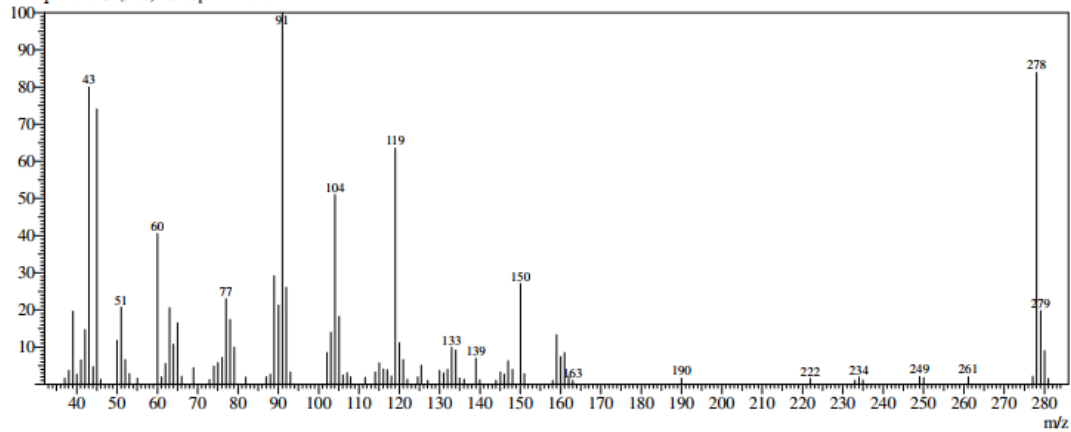

b

Figure S4. NMR  $^1\text{H}$  (a) in  $\text{DMSO-d}_6$  and mass spectrum (EI) (b) of 4d.

## 2. NMR and mass spectra of products 5 and 7

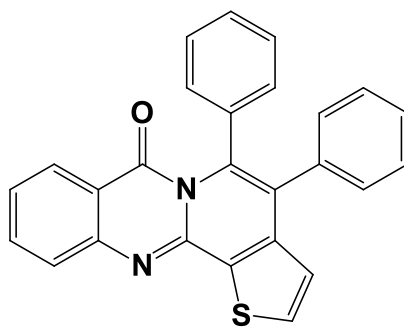

5a

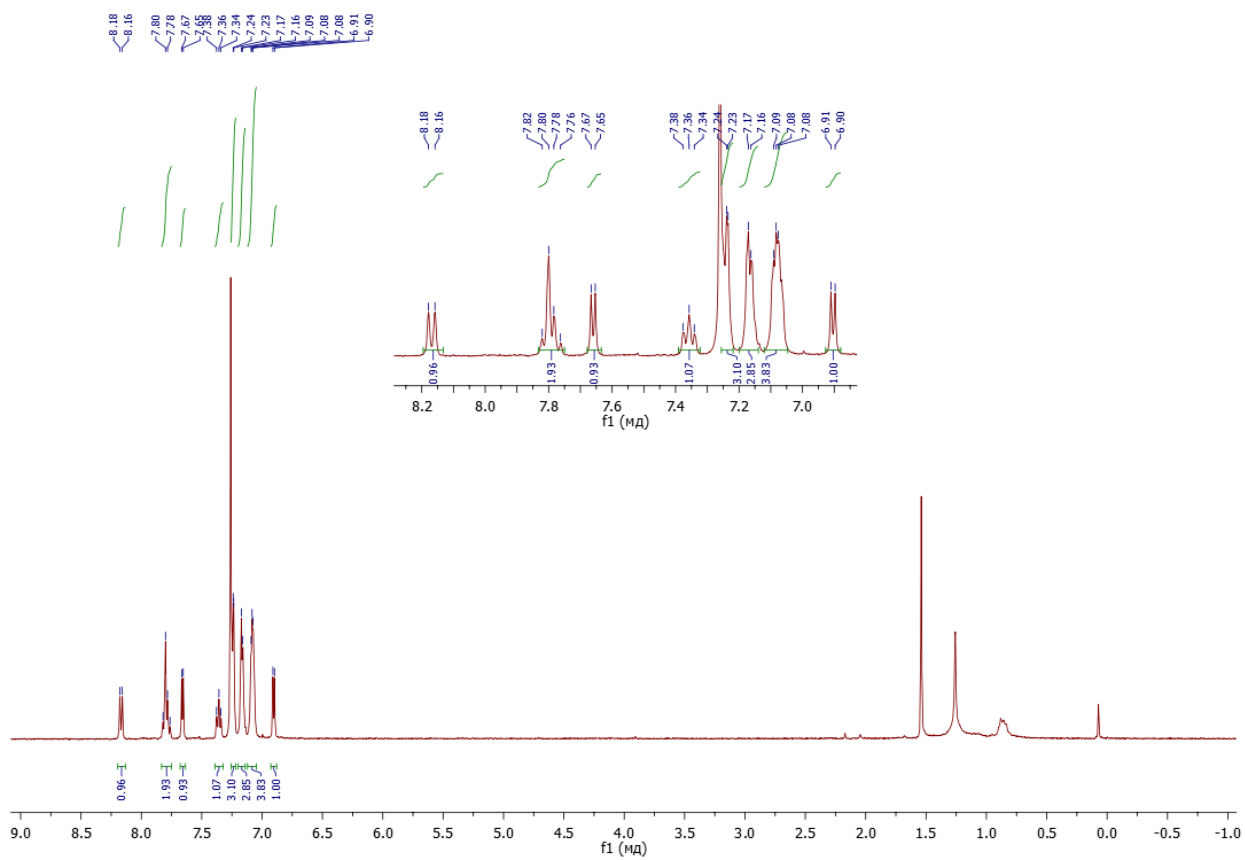

a

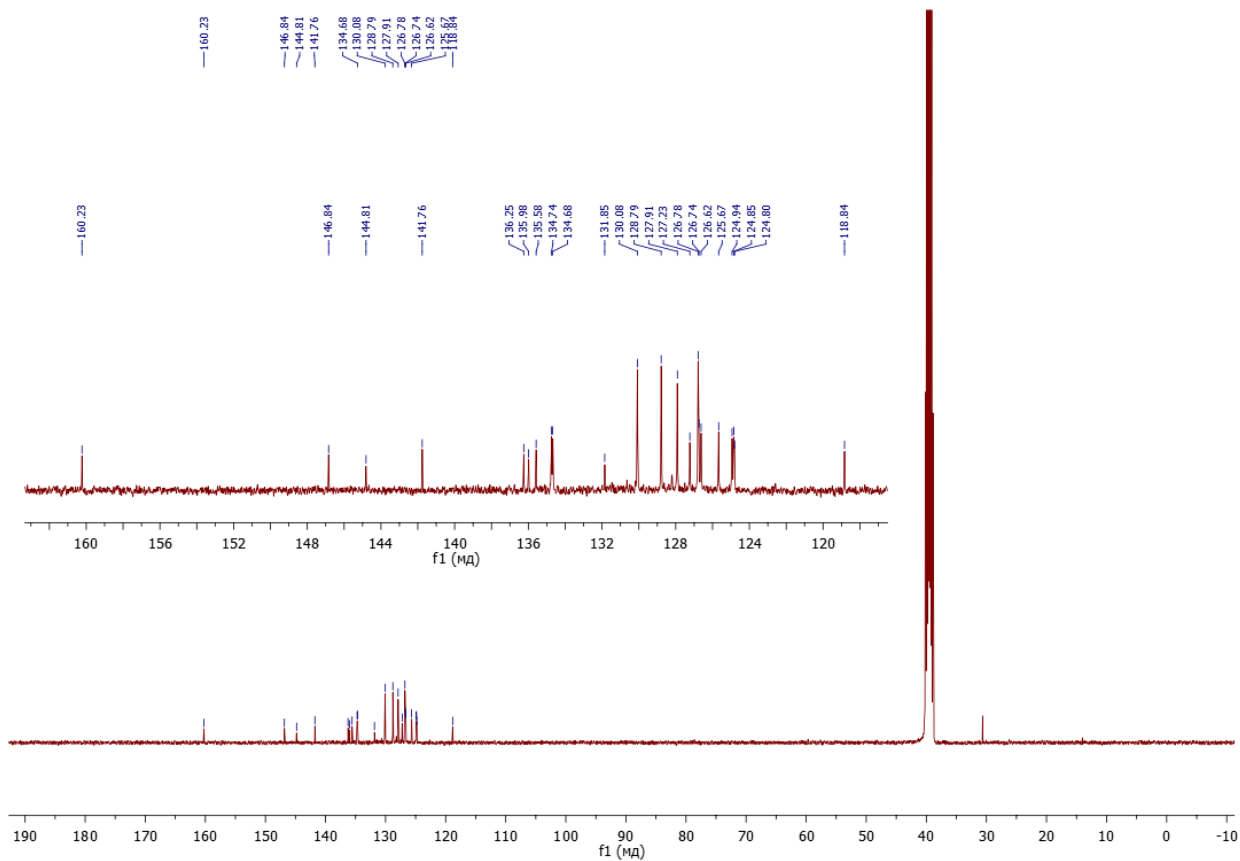

b

Line#:1 R.Time:2.755(Scan#:1083)  
 MassPeaks:78  
 RawMode:Single 2.755(1083) BasePeak:404(5687085)  
 Фон.реж.:1.107(424) Group 1 - Event 1

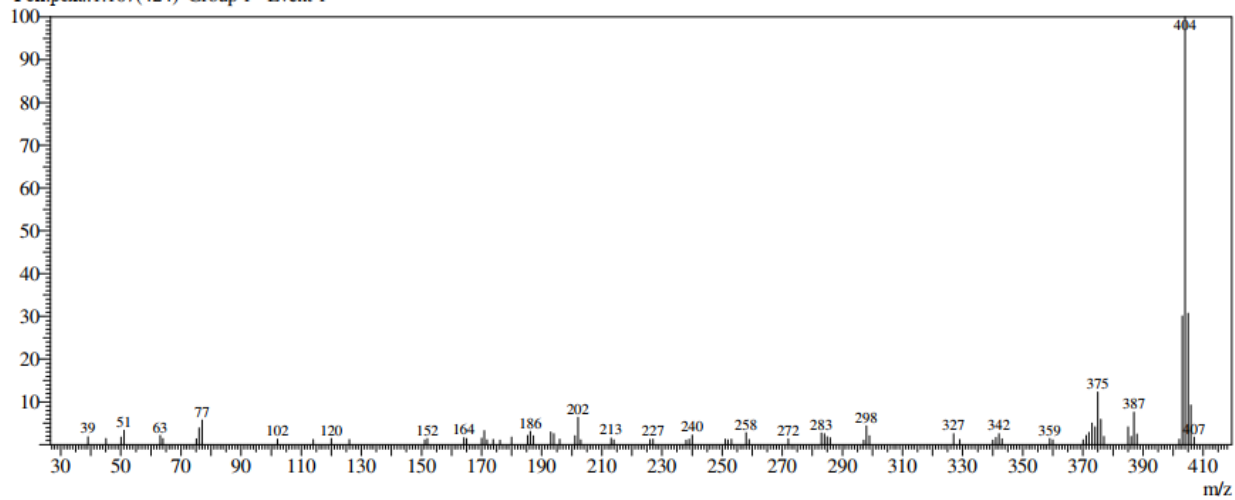

c

Figure S5. NMR  $^1\text{H}$  (a),  $^{13}\text{C}$  (b), in  $\text{CDCl}_3$  and mass spectrum (EI) (c) of **5a**.



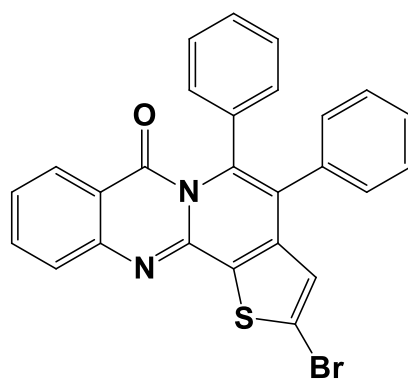

5b

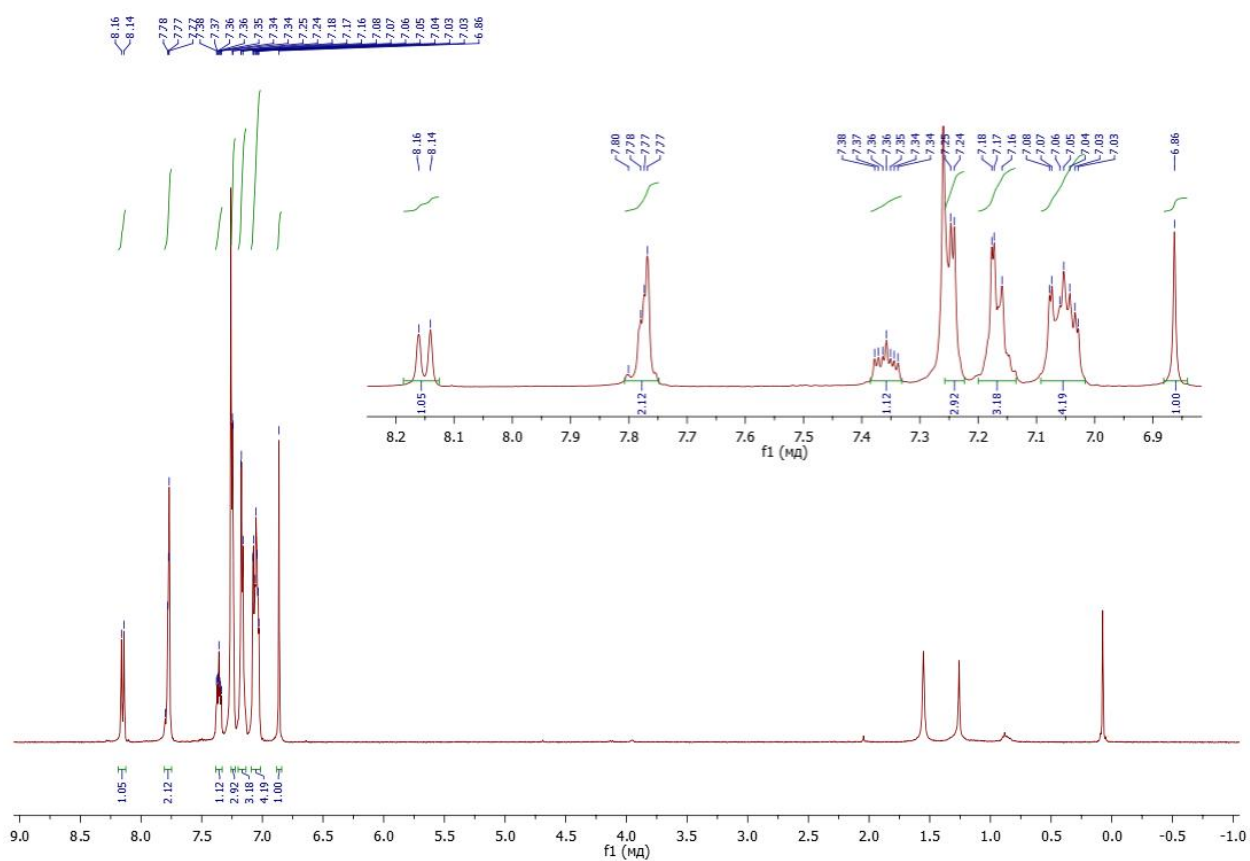

a

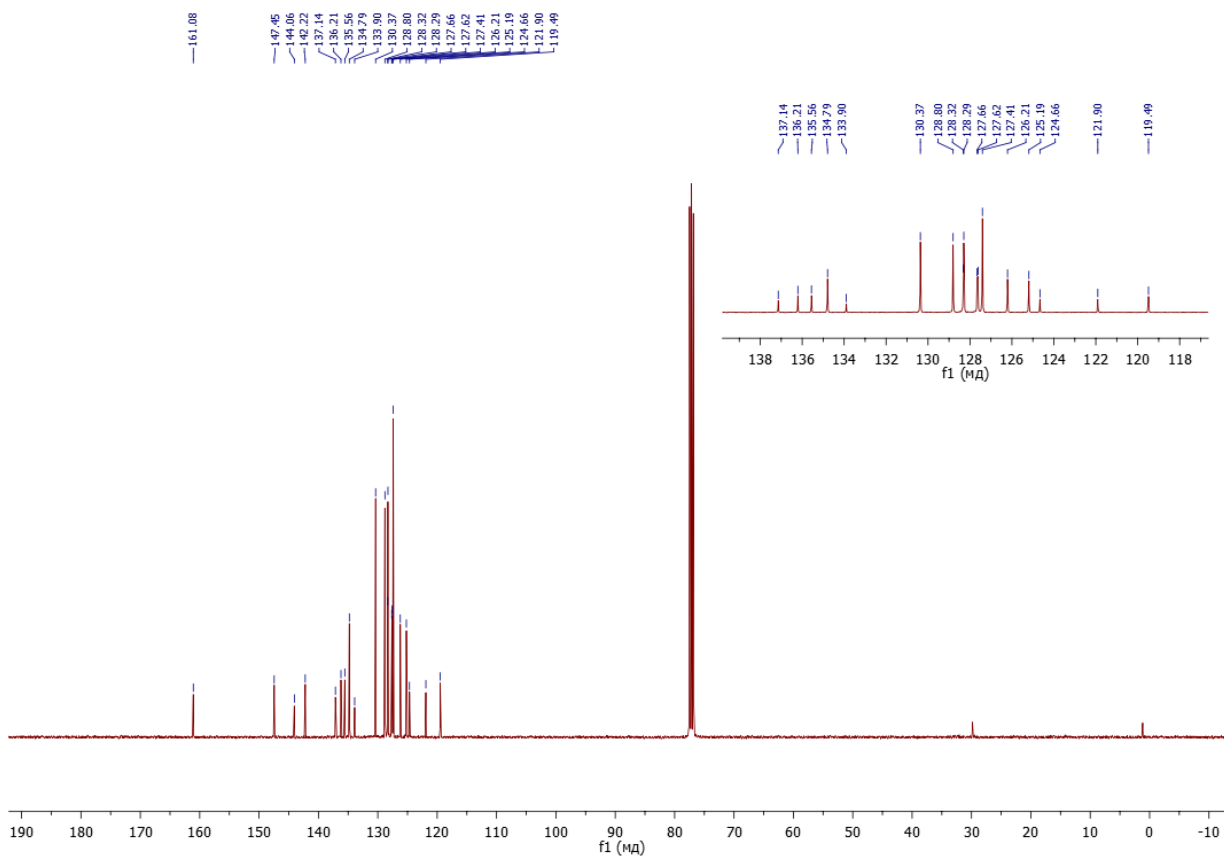

b

Line#:1 R.Time:2.182(Scan#:854)  
 MassPeaks:231  
 RawMode:Single 2.183(854) BasePeak:484(1496194)  
 Фон.реж.:None Group 1 - Event 1

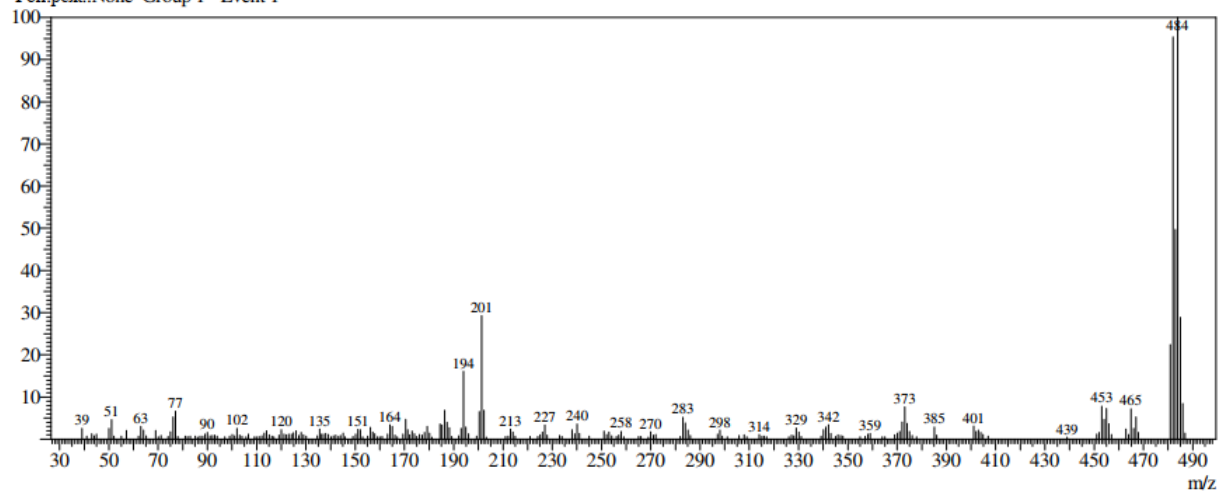

c

Figure S6. NMR  $^1\text{H}$  (a),  $^{13}\text{C}$  (b), in  $\text{CDCl}_3$  and mass spectrum (EI) (c) of **5b**.

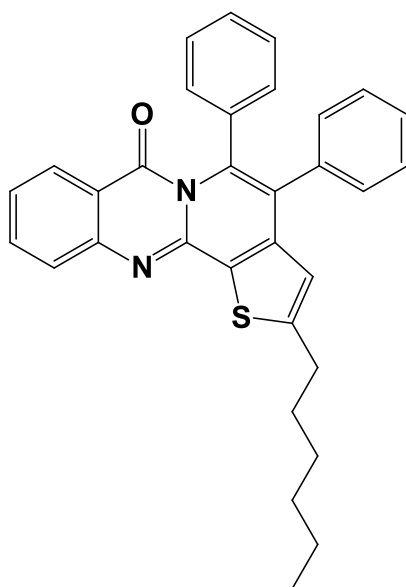

5c

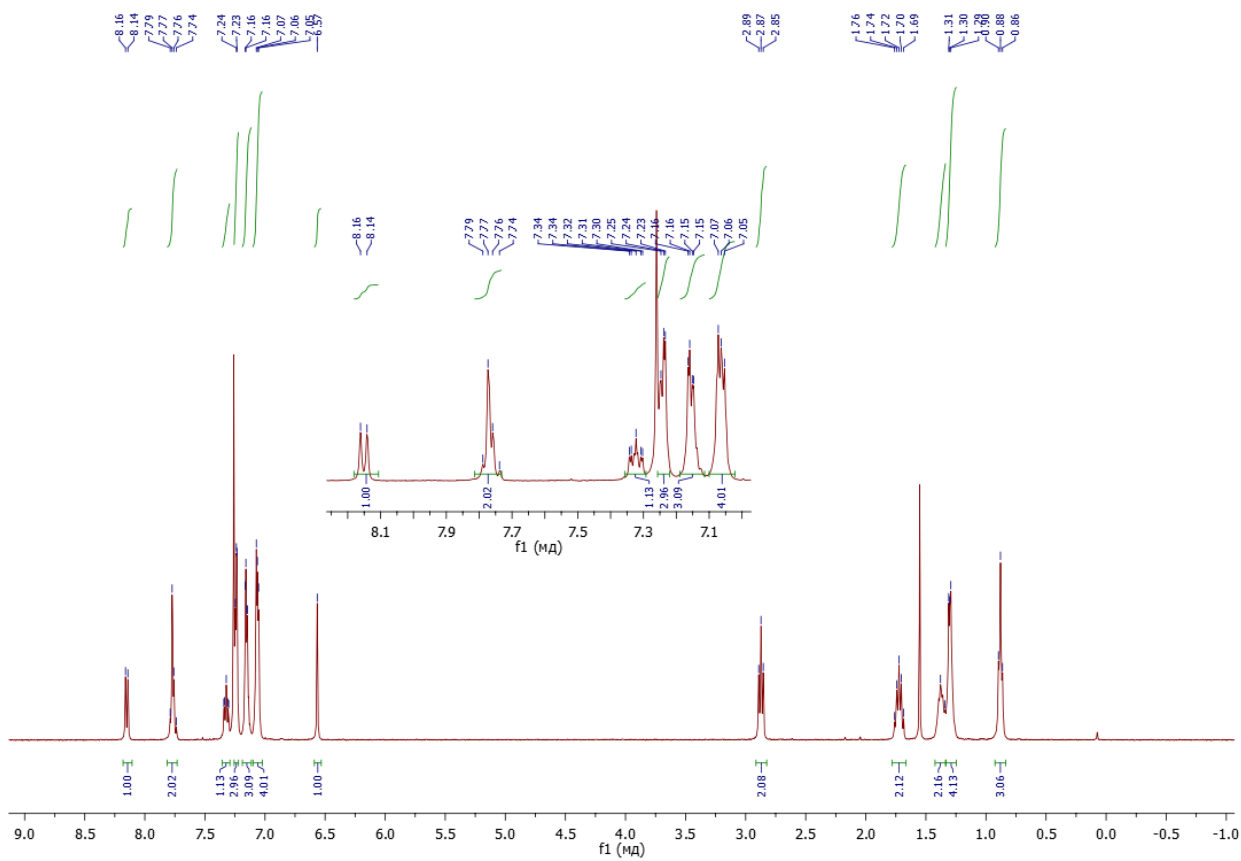

a

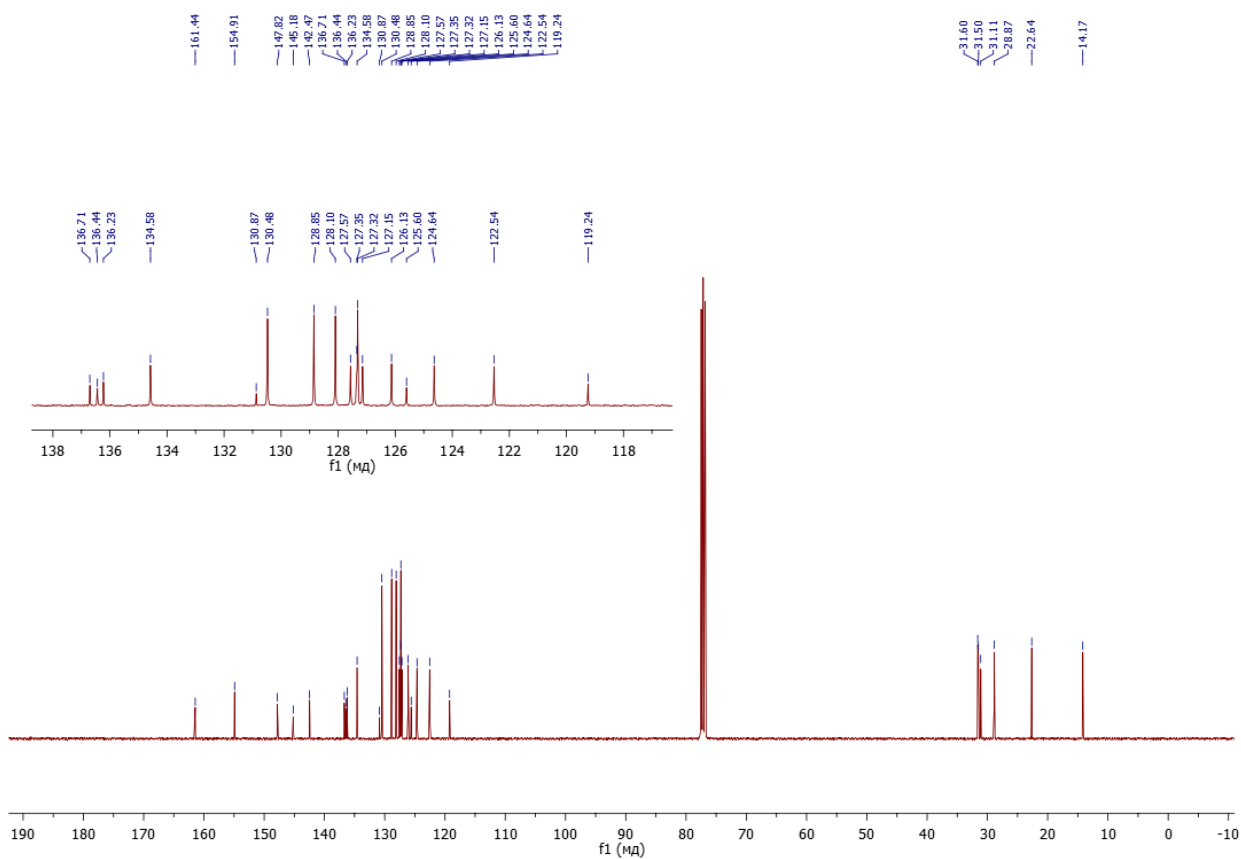

b

Line#:1 R.Time:4.848(Scan#:1920)  
 MassPeaks:48  
 RawMode:Single 4.848(1920) BasePeak:488(4270913)  
 Фон.реж.:3.260(1285) Group 1 - Event 1

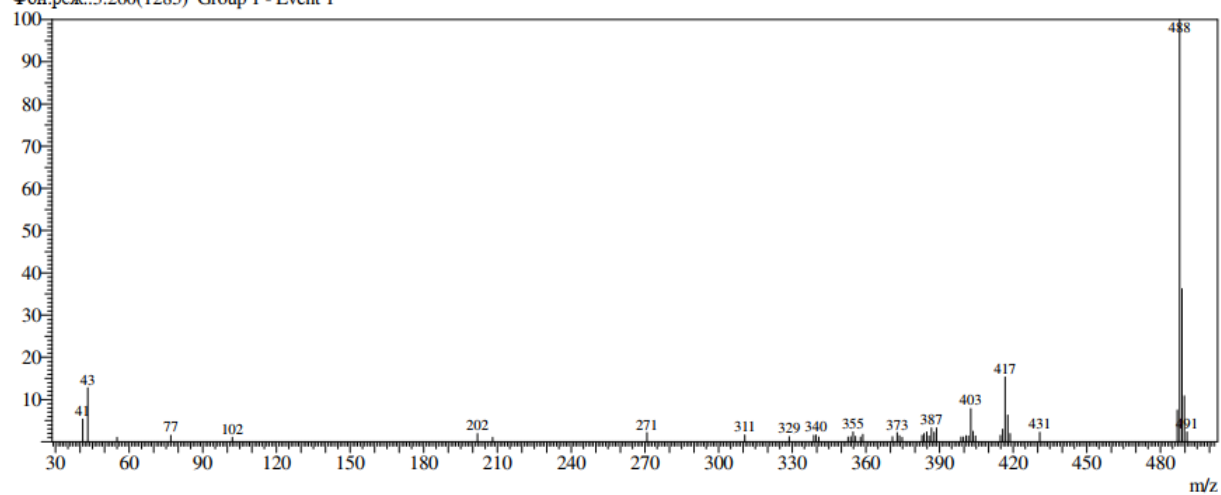

c

**Figure S7.** NMR  $^1\text{H}$  (a),  $^{13}\text{C}$  (b), in  $\text{CDCl}_3$  and mass spectrum (EI) (c) of **5c**.

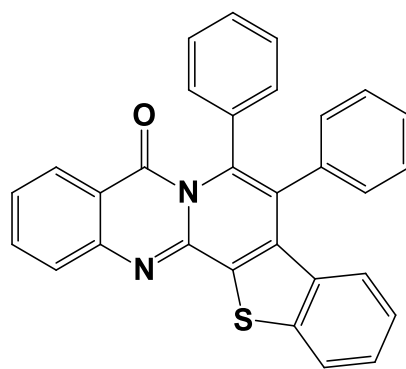

5d

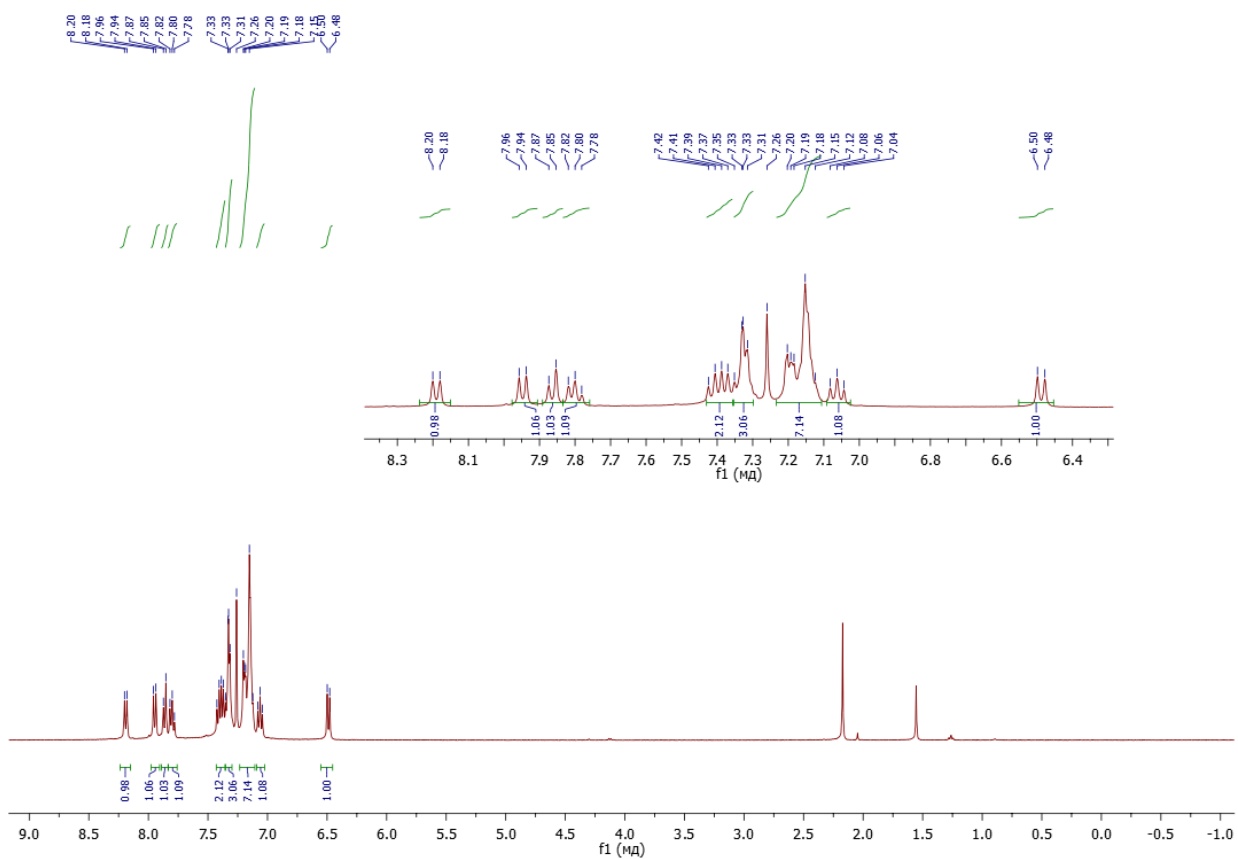

a

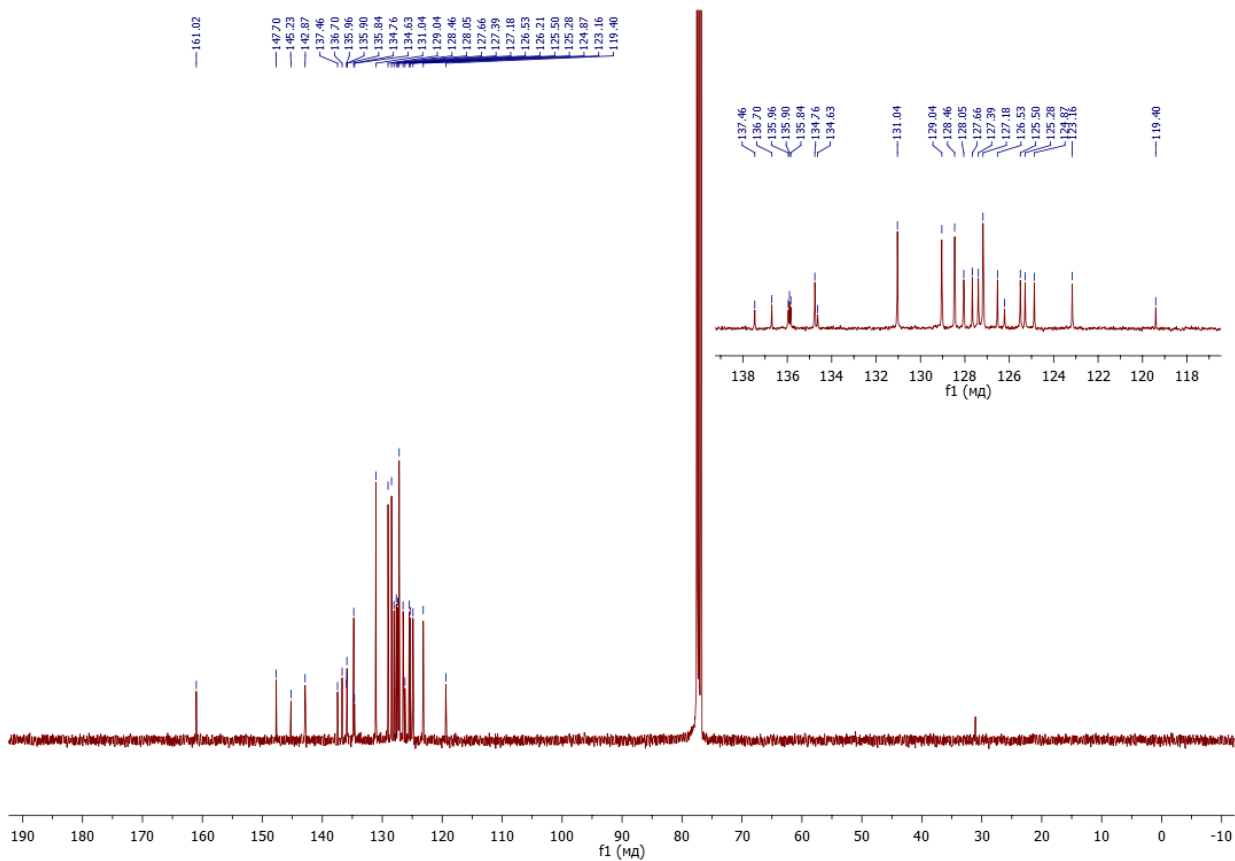

b

Line#:1 R.Time:3.847(Scan#:1520)

MassPeaks:57

RawMode:Single 3.848(1520) BasePeak:454(6078911)

Фон.реж.:1.942(758) Group 1 - Event 1

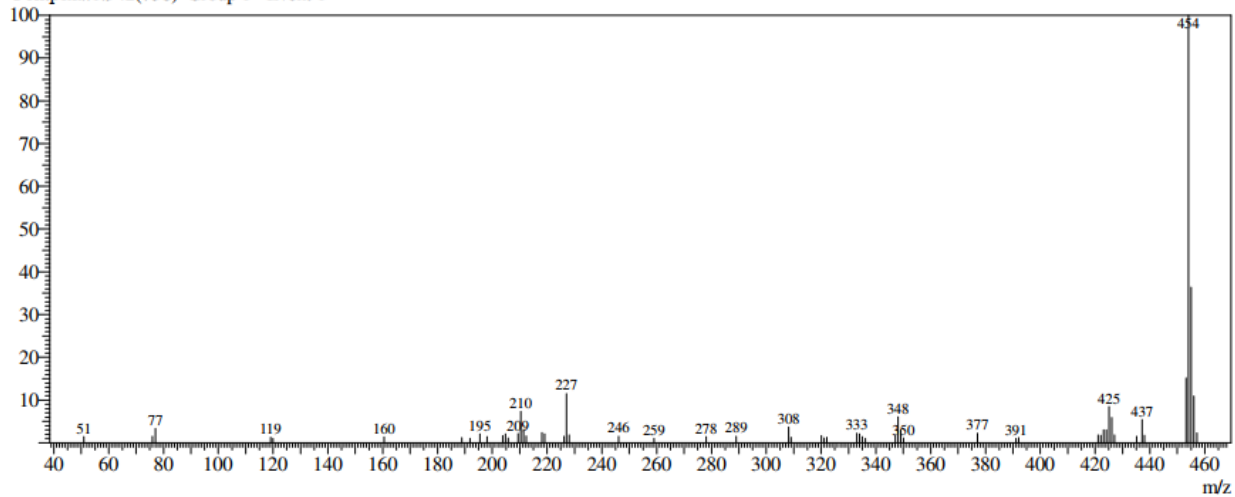

c

**Figure S8.** NMR  $^1\text{H}$  (a),  $^{13}\text{C}$  (b), in  $\text{CDCl}_3$  and mass spectrum (EI) (c) of **5d**.

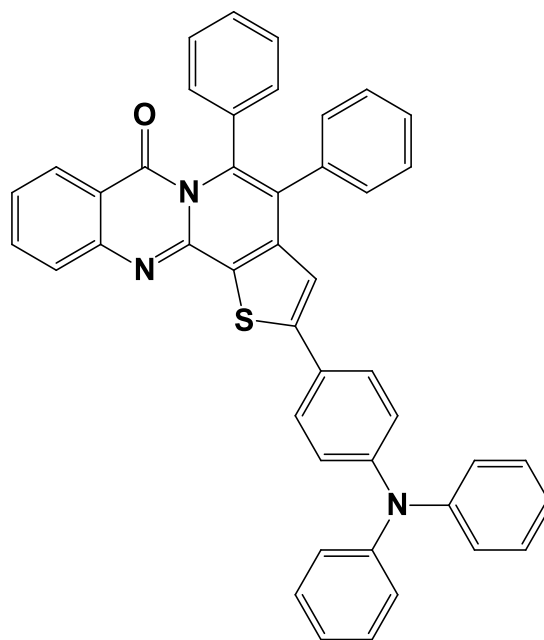

5e

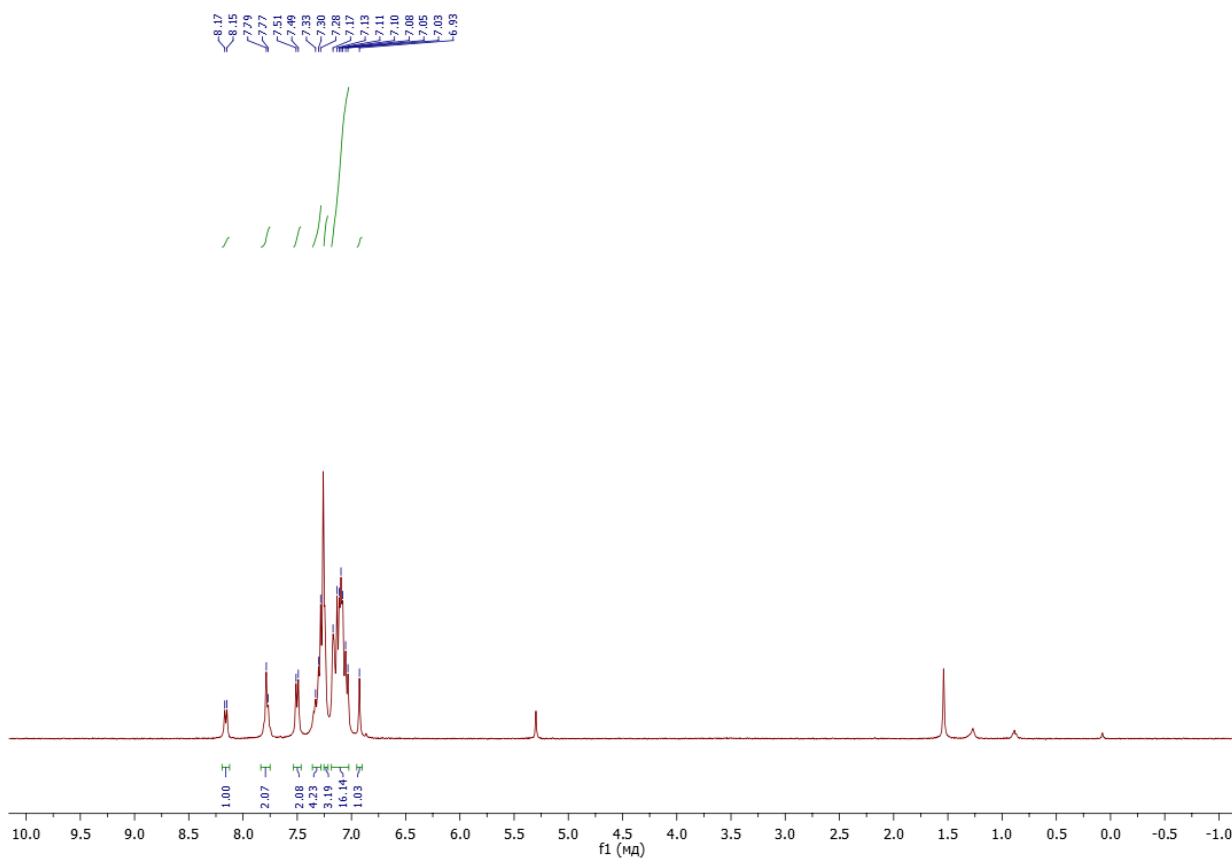

a

Line#:1 R.Time:5.555(Scan#:2203)  
MassPeaks:144  
RawMode:Single 5.555(2203) BasePeak:647(357534)  
Фон.реж.:2.625(1031) Group 1 - Event 1

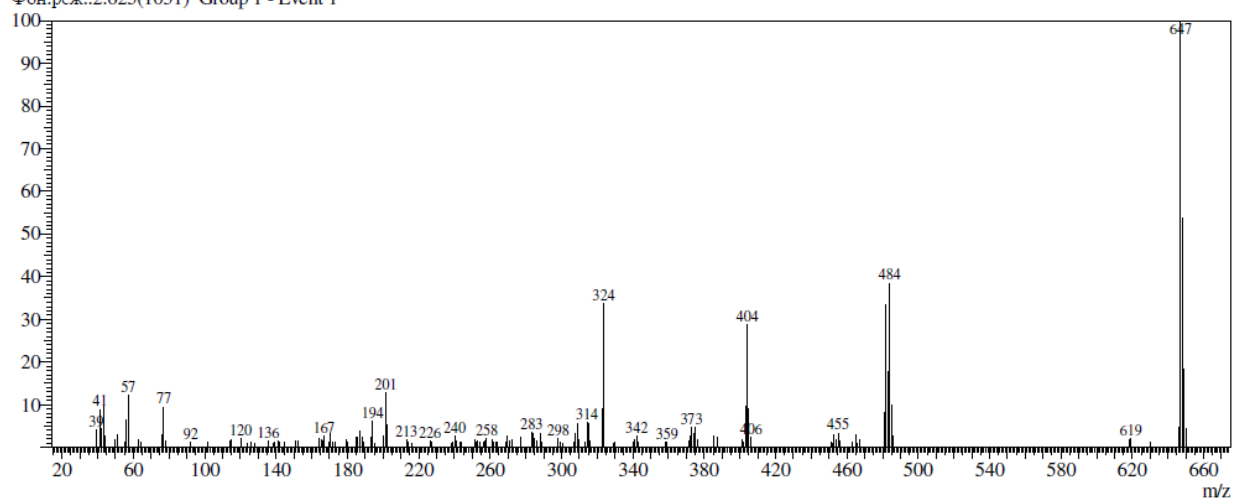

b

**Figure S9.** NMR  $^1\text{H}$  (a) in  $\text{CDCl}_3$  and mass spectrum (EI) (b) of **5e**.



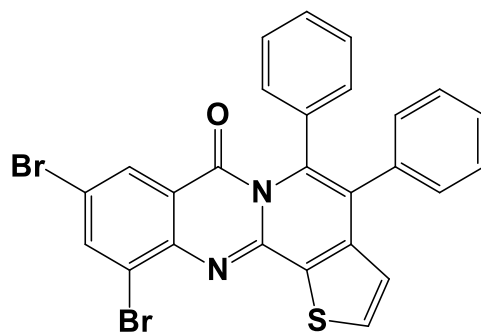

5f

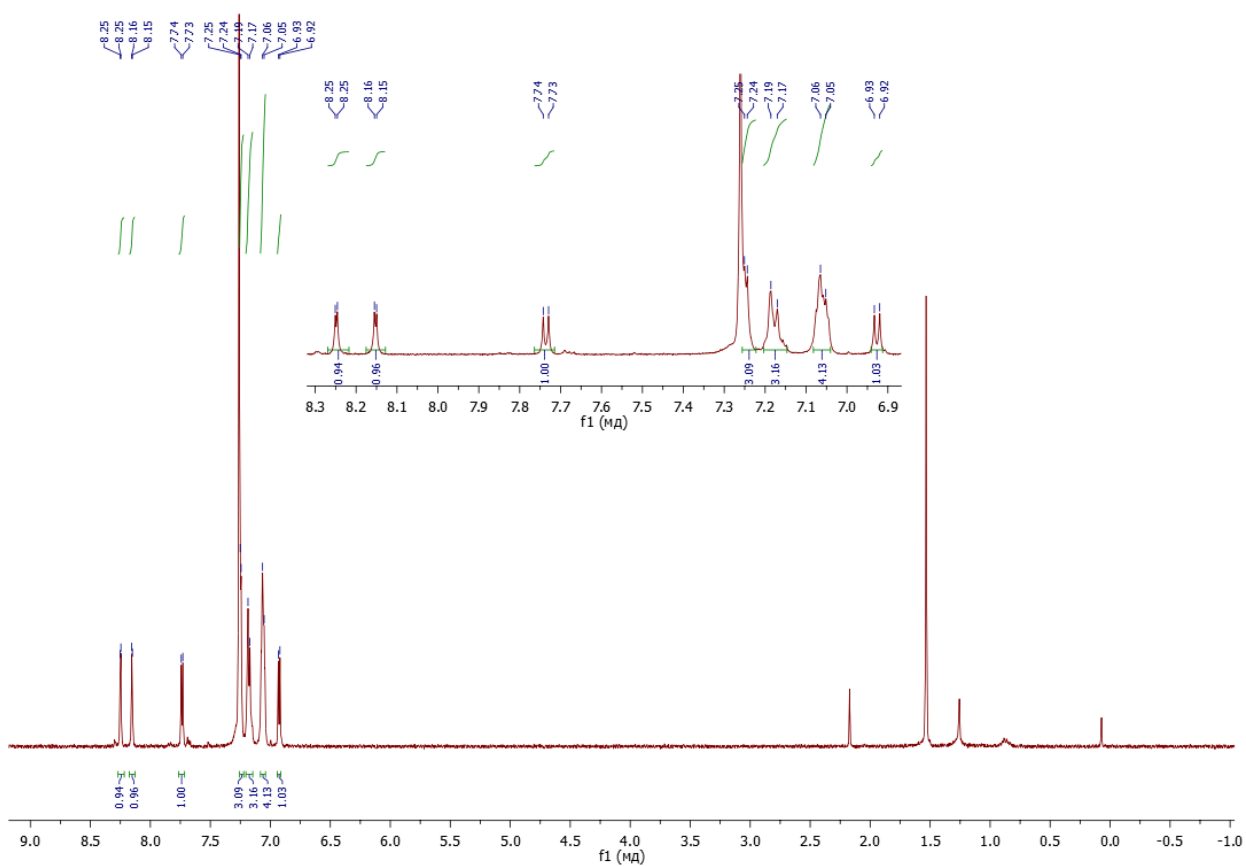

a

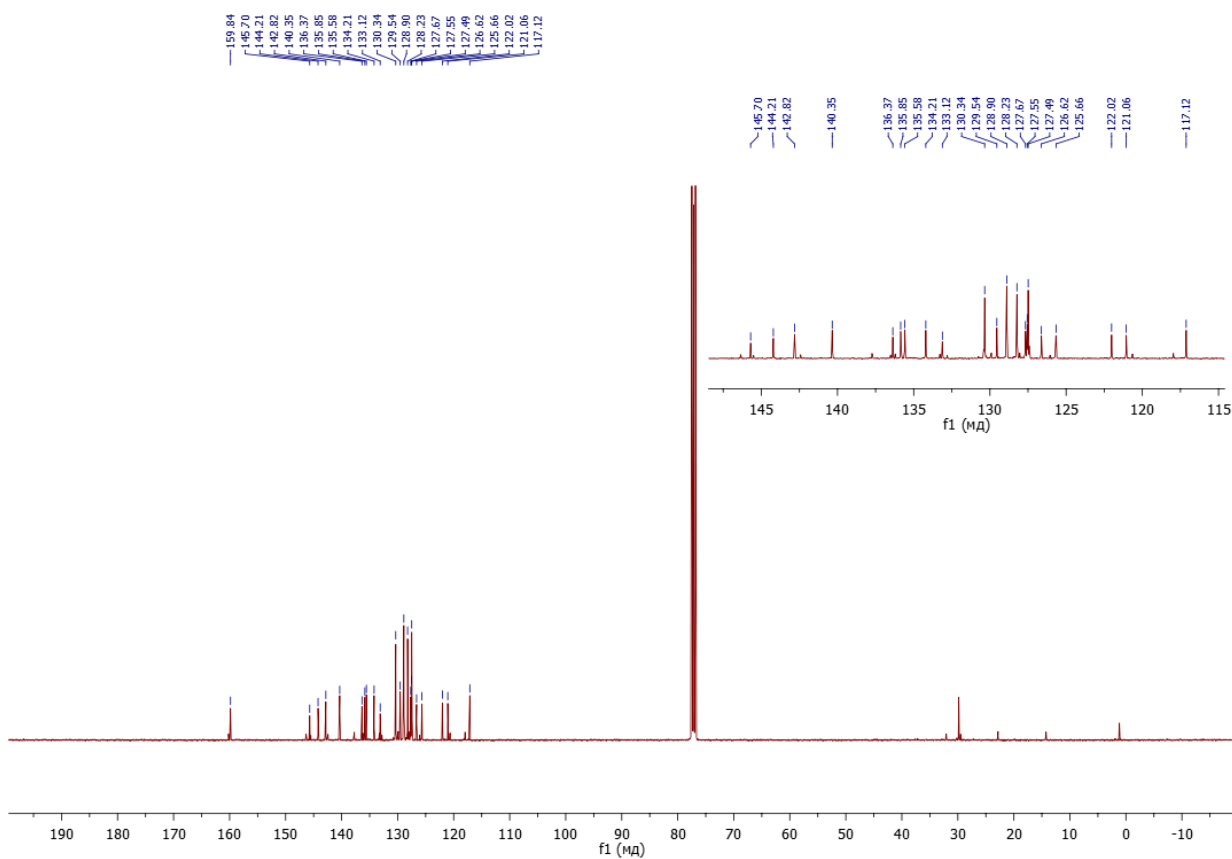

b

Line#:1 R.Time:3.653(Scan#:1422)  
 MassPeaks:205  
 RawMode:Single 3.652(1422) BasePeak:562(711988)  
 Фон.реж.:2.158(824) Group 1 - Event 1

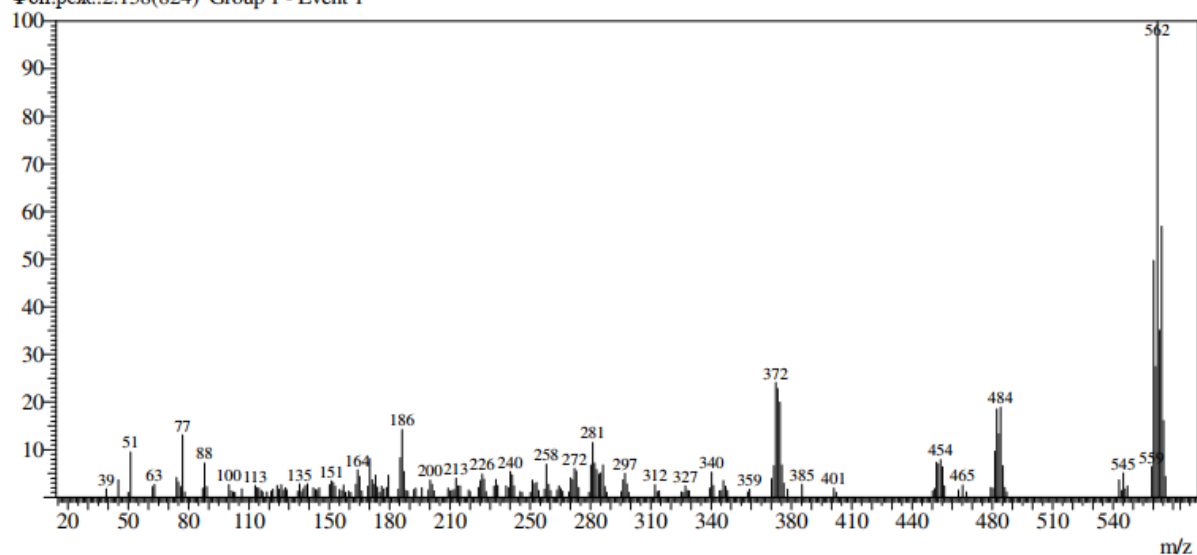

c

**Figure S10.** NMR  $^1\text{H}$  (a),  $^{13}\text{C}$  (b), in  $\text{CDCl}_3$  and mass spectrum (EI) (c) of **5f**.

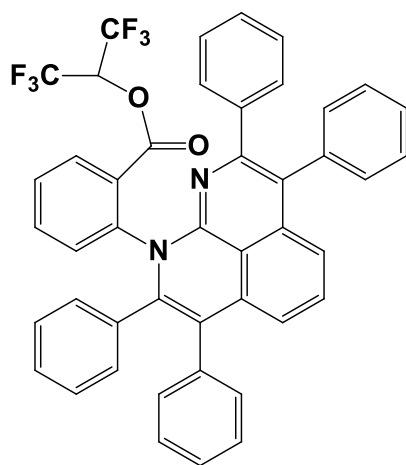

7

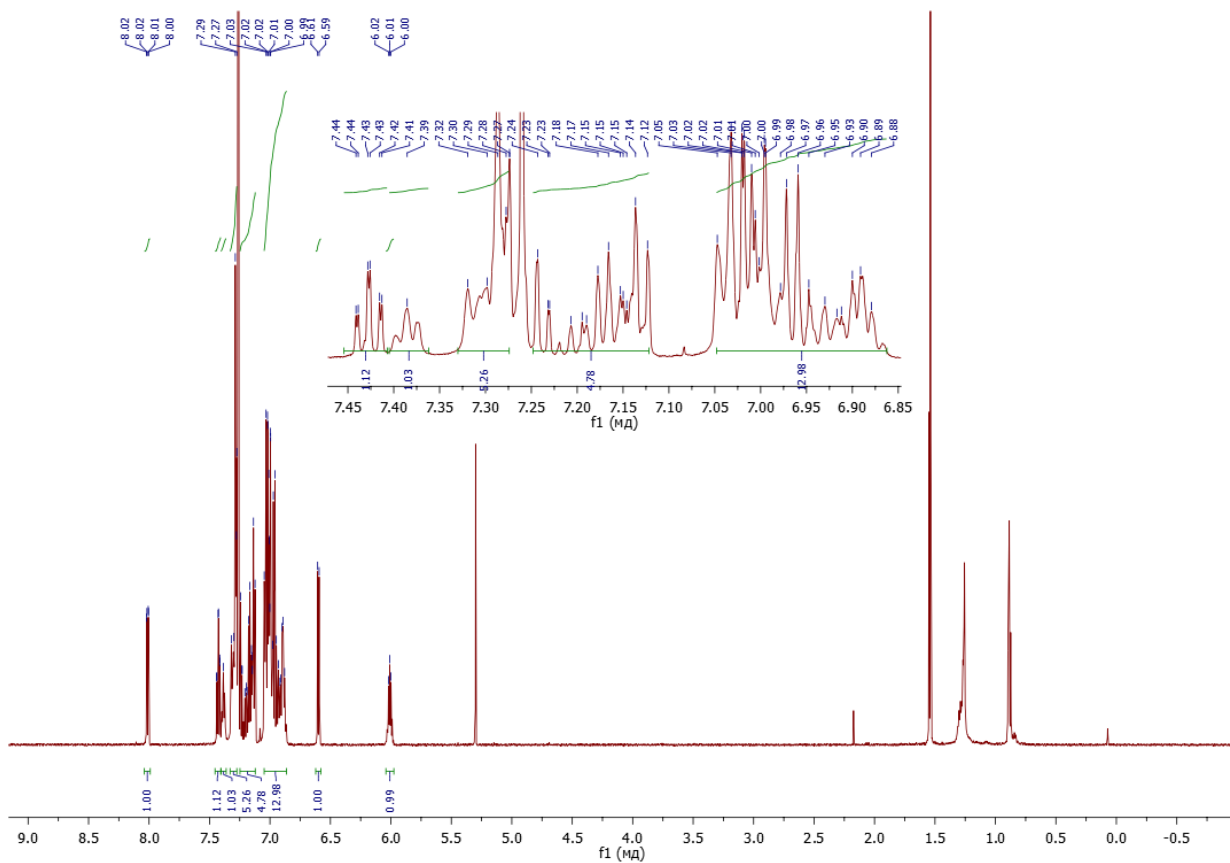

a

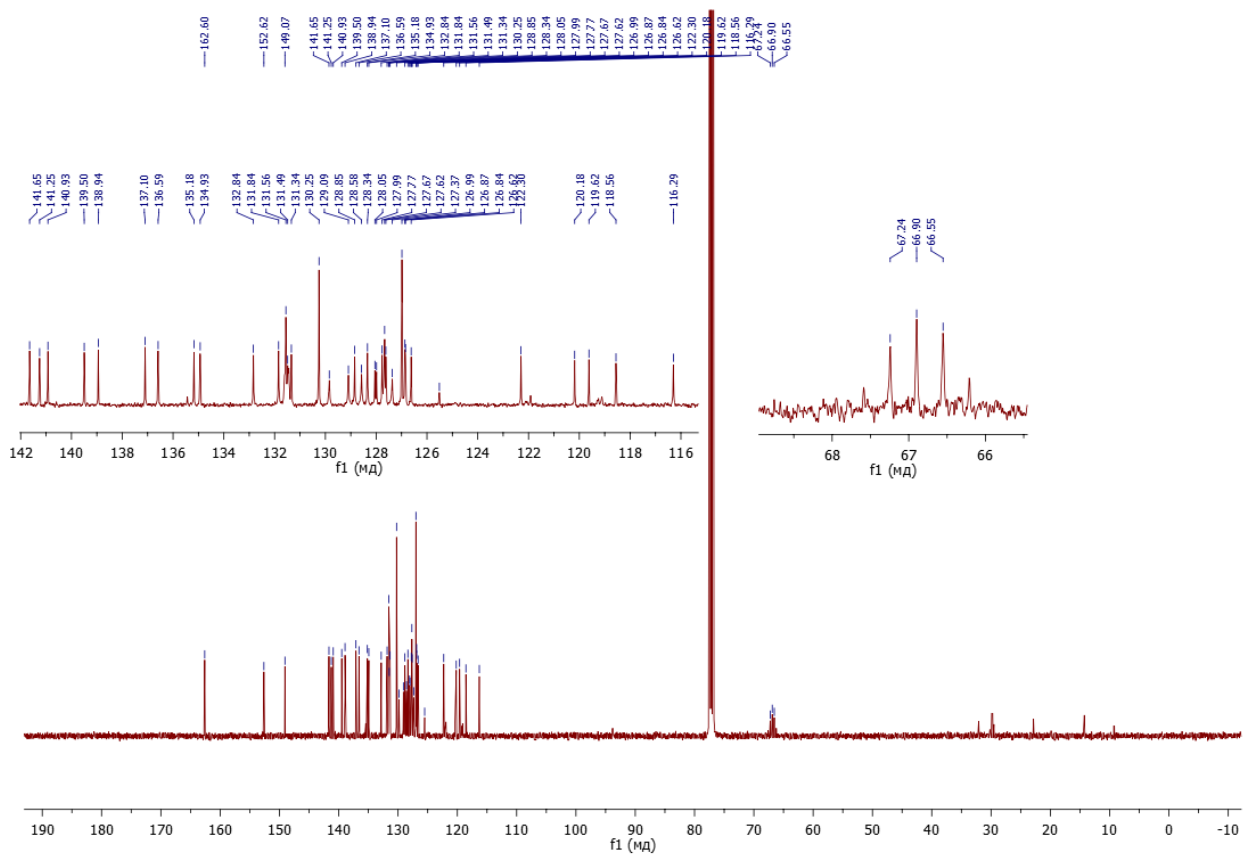

b

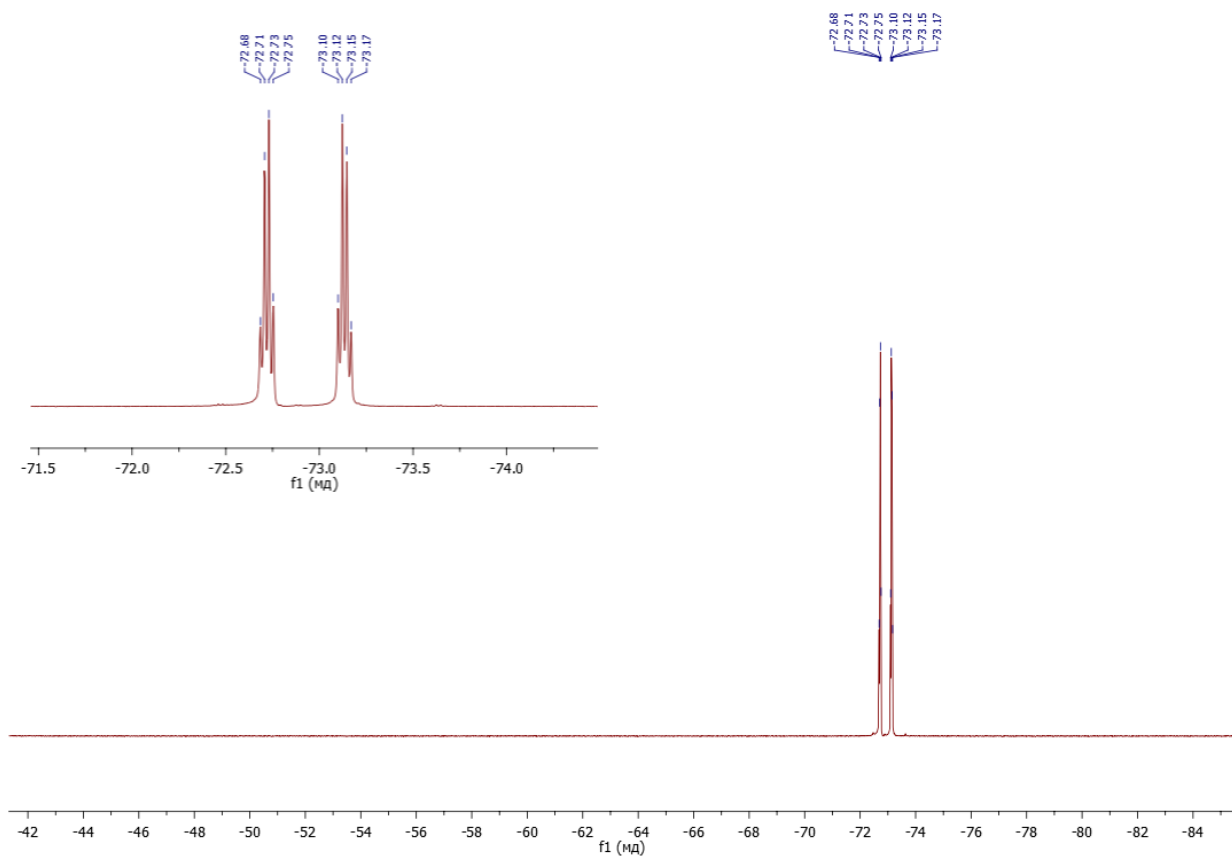

c

Line#:1 R.Time:3.863(Scan#:2259)  
MassPeaks:125  
RawMode:Single 3.863(2259) BasePeak:547(5697238)  
Фон.реж.:None Group 1 - Event 1

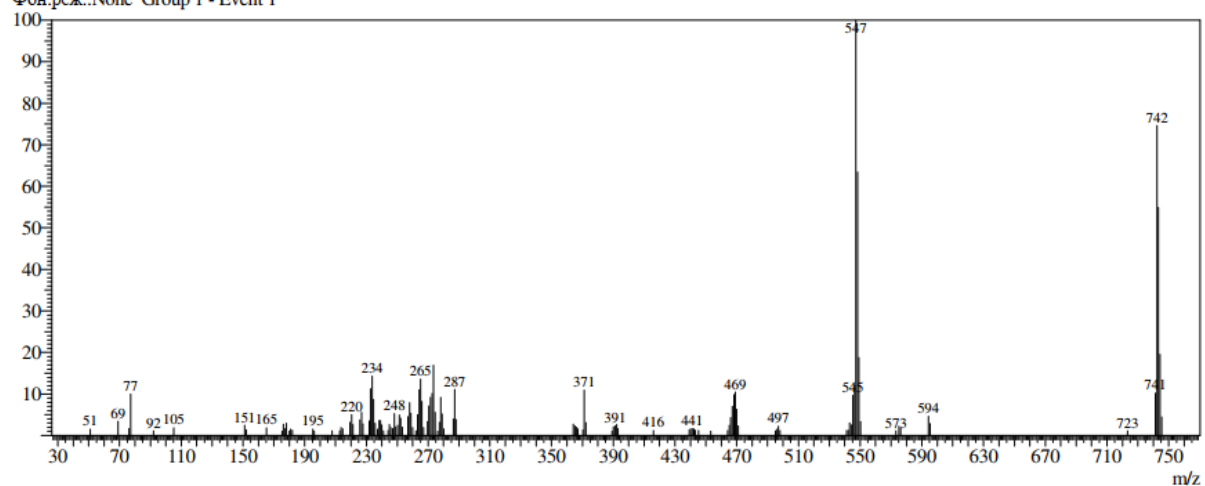

d

**Figure S11.** NMR  $^1\text{H}$  (a),  $^{13}\text{C}$  (b),  $^{19}\text{F}$  (c) in  $\text{CDCl}_3$  and mass (d) spectra of **7**.



Line#:1 R.Time:2.960(Scan#:1165)  
MassPeaks:86  
RawMode:Single 2.960(1165) BasePeak:398(5753608)  
Фон.реж.:1.208(464) Group 1 - Event 1

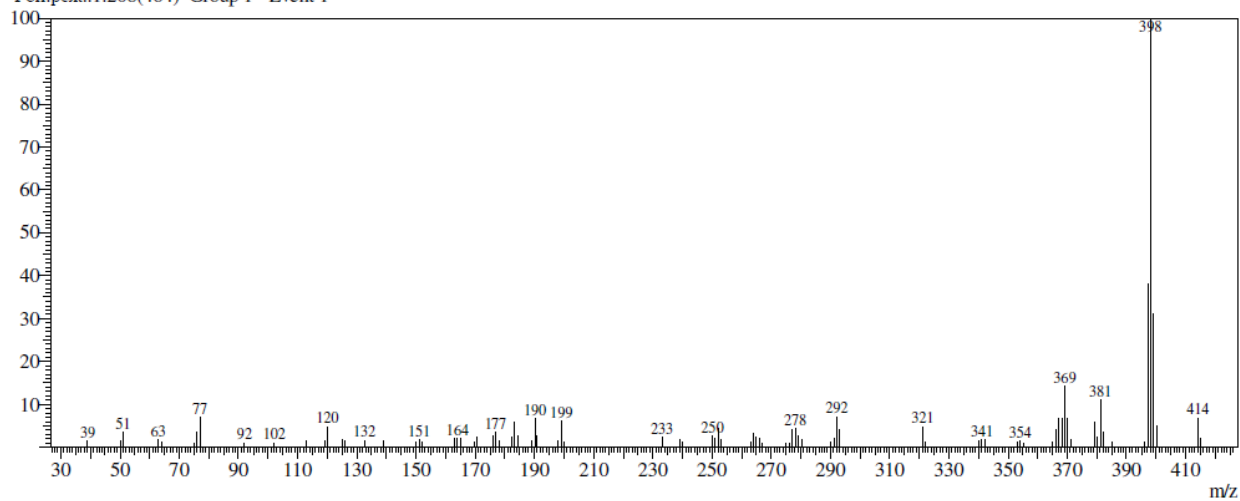

C

**Figure S12.** NMR  $^1\text{H}$  (a) in  $\text{CDCl}_3$  and mass (d) spectra of **8**.

### 3. UV/Vis, fluorescence excitation and fluorescence emission spectra of compounds 5a-e, 7

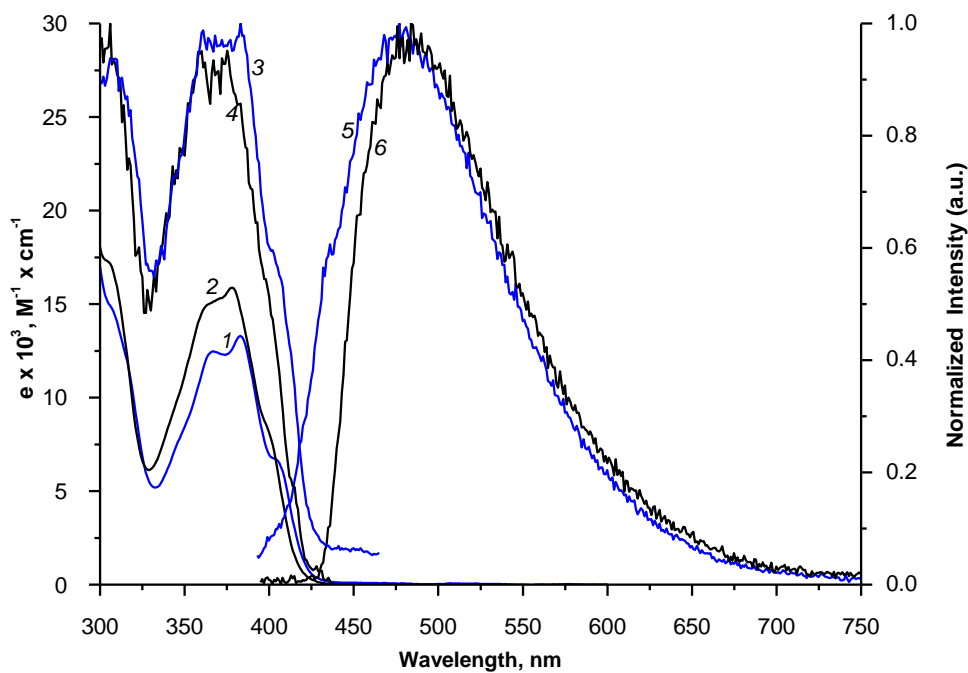

**Figure S13.** UV/Vis (1, 2), fluorescence excitation (3,4) and fluorescence emission (5, 6) spectra of **5a** in toluene (1, 3, 5) and MeCN (2, 4, 6) at room temperature.

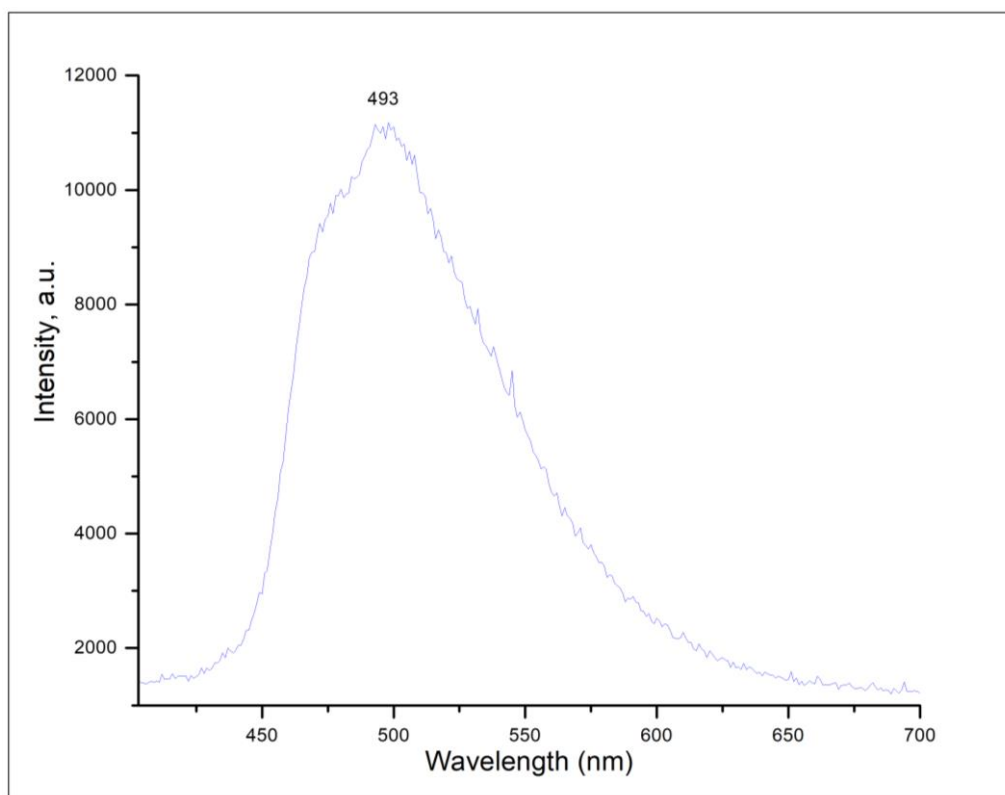

**Figure S14.** Fluorescence emission spectrum of **5a** in solid state at room temperature.



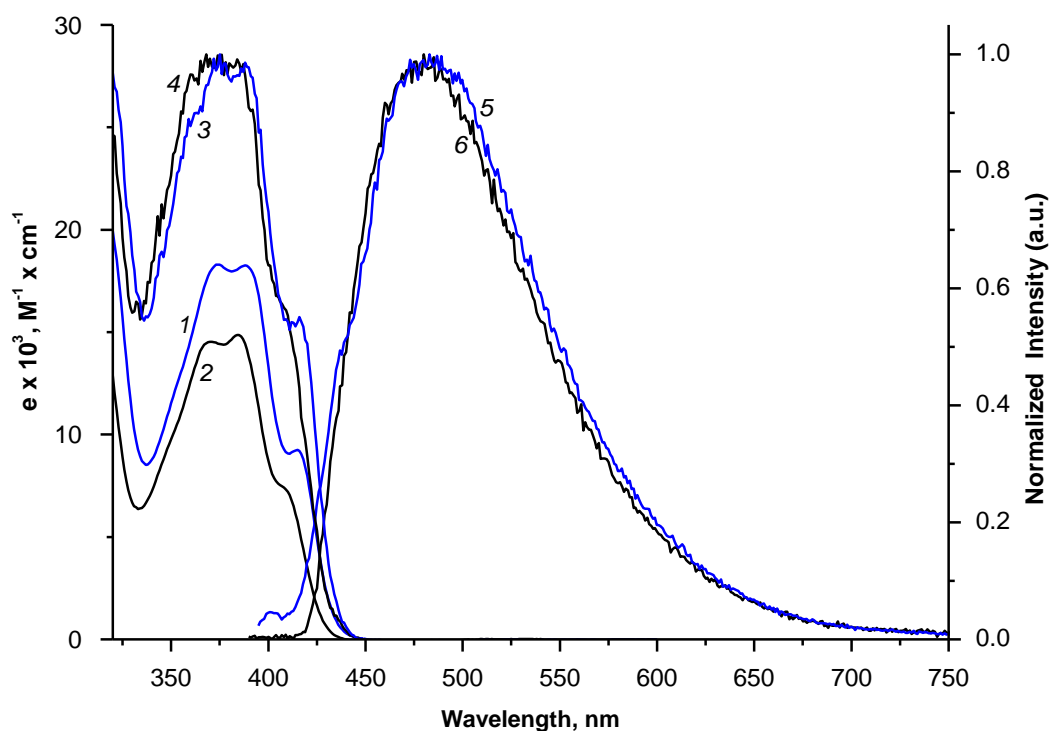

**Figure S15.** UV/Vis (1, 2), fluorescence excitation (3, 4) and fluorescence emission (5, 6) spectra of **5b** in toluene (1, 3, 5) and MeCN (2, 4, 6) at room temperature.

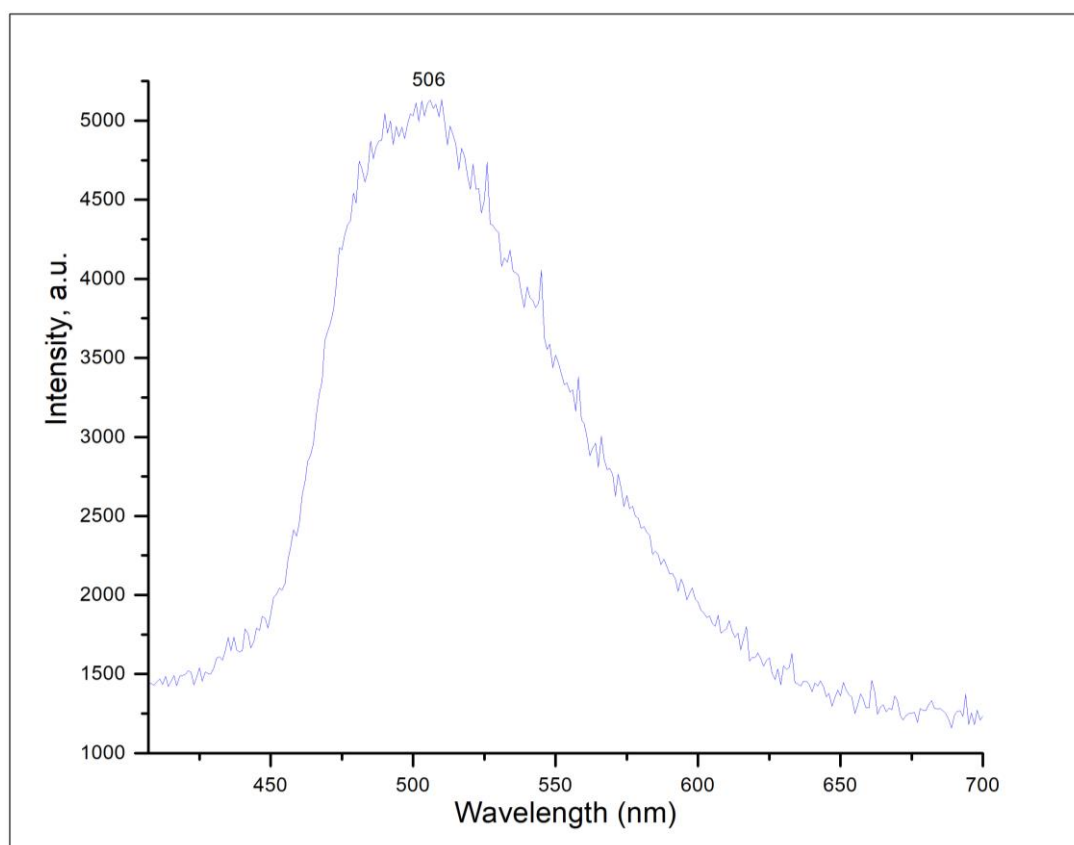

**Figure S16.** Fluorescence emission spectrum of **5b** in solid state at room temperature.

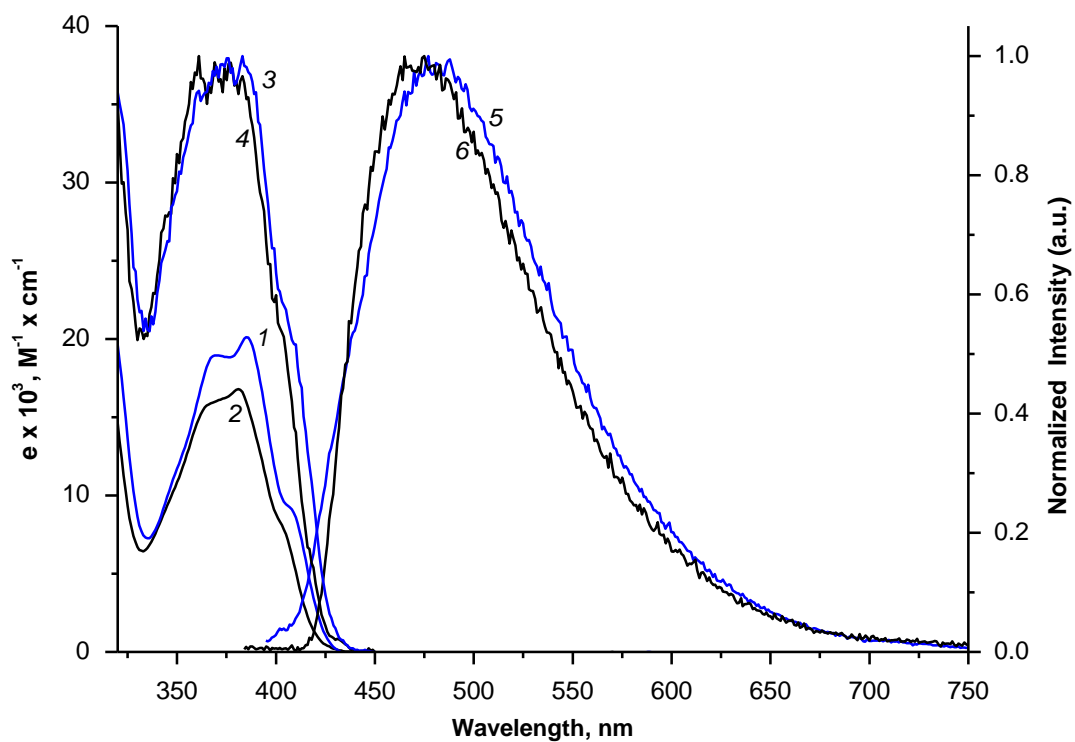

**Figure S17.** UV/Vis (1, 2), fluorescence excitation (3, 4) and fluorescence emission (5, 6) spectra of **5c** in toluene (1, 3, 5) and MeCN (2, 4, 6) at room temperature.

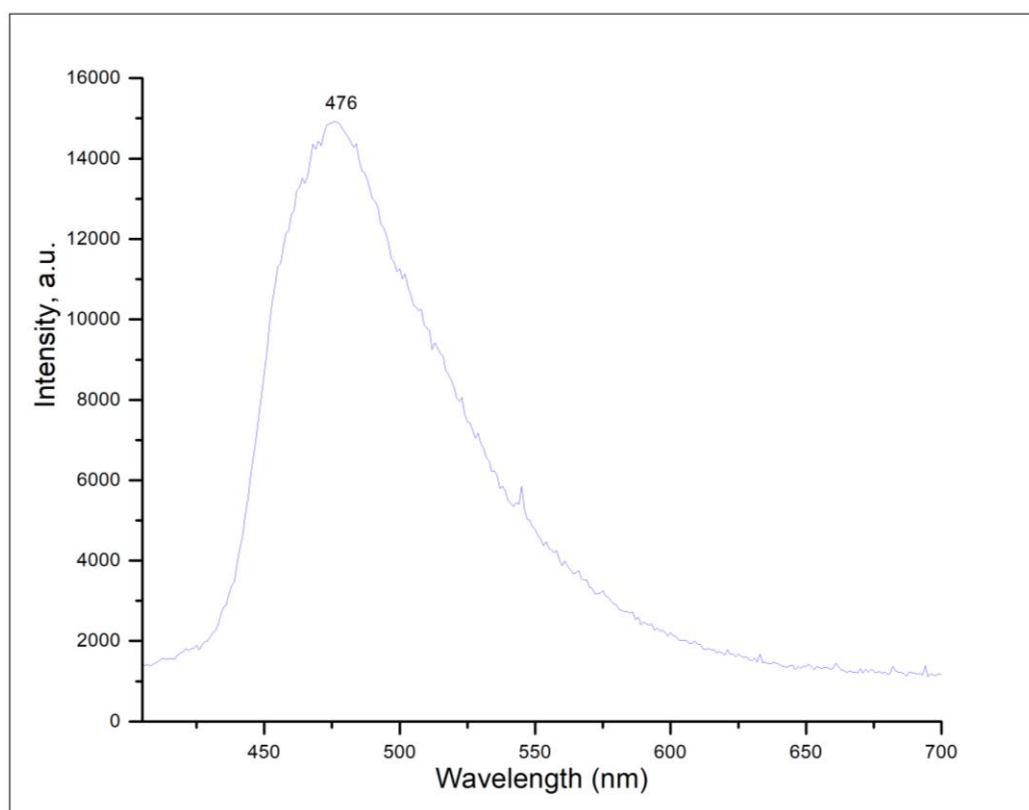

**Figure S18.** Fluorescence emission spectrum of **5c** in solid state at room temperature.

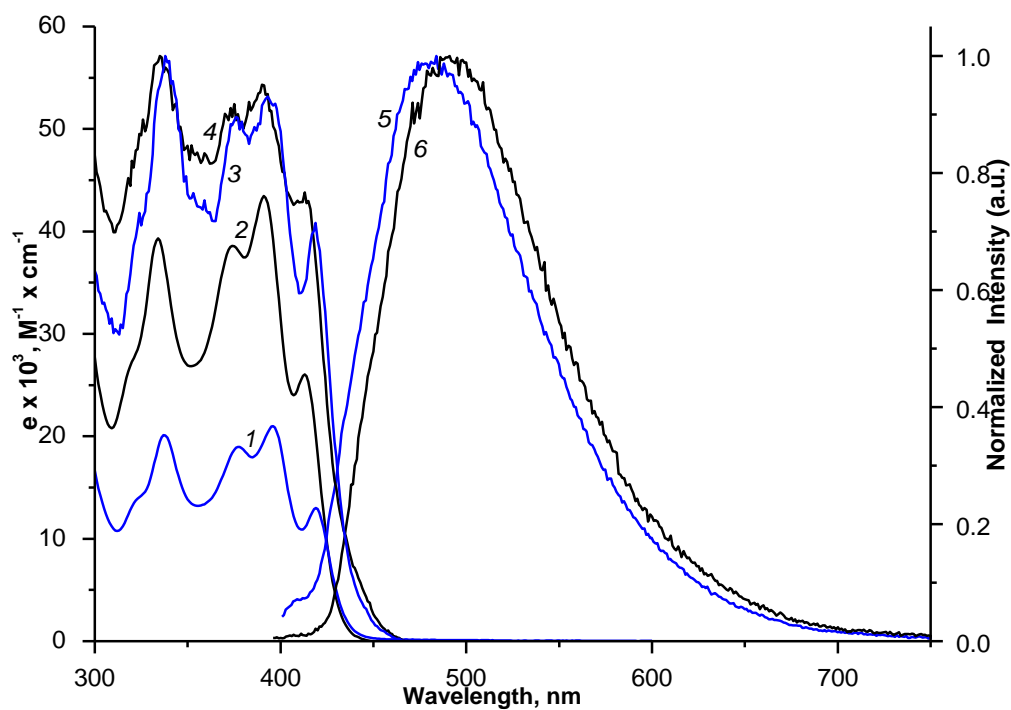

**Figure S19.** UV/Vis (1, 2), fluorescence excitation (3, 4) and fluorescence emission (5, 6) spectra of **5d** in toluene (1, 3, 5) and MeCN (2, 4, 6) at room temperature.

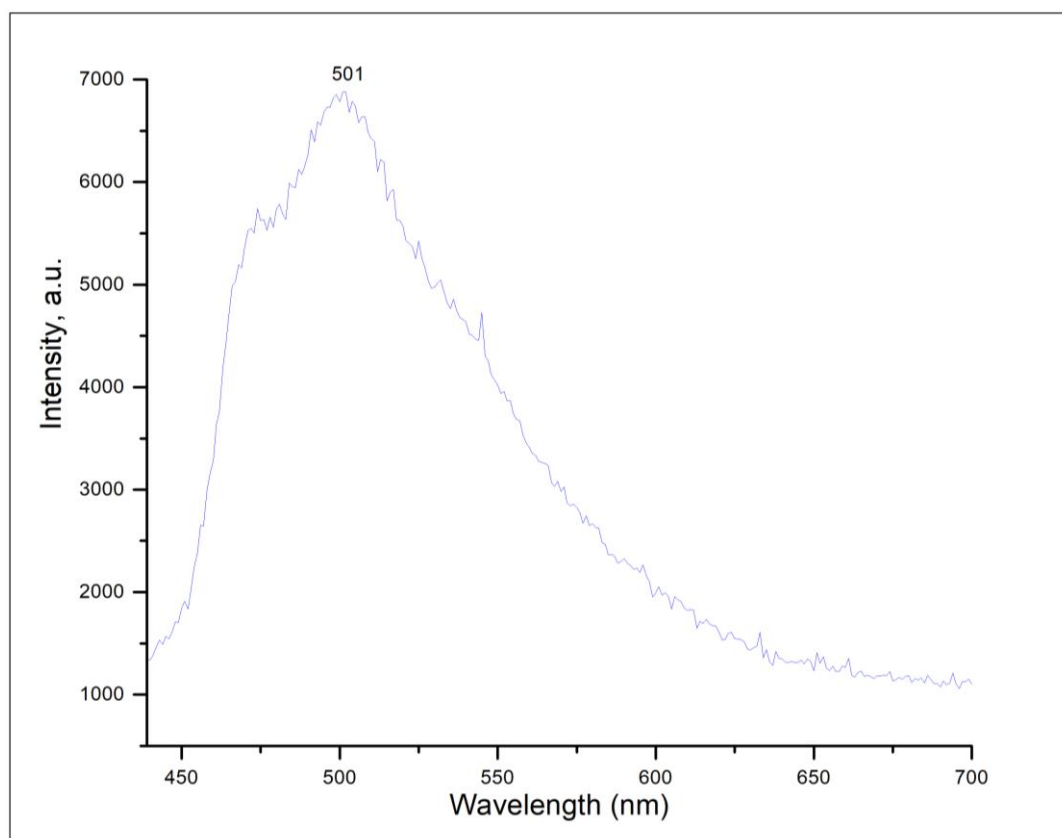

**Figure S20.** Fluorescence emission spectrum of **5d** in solid state at room temperature.

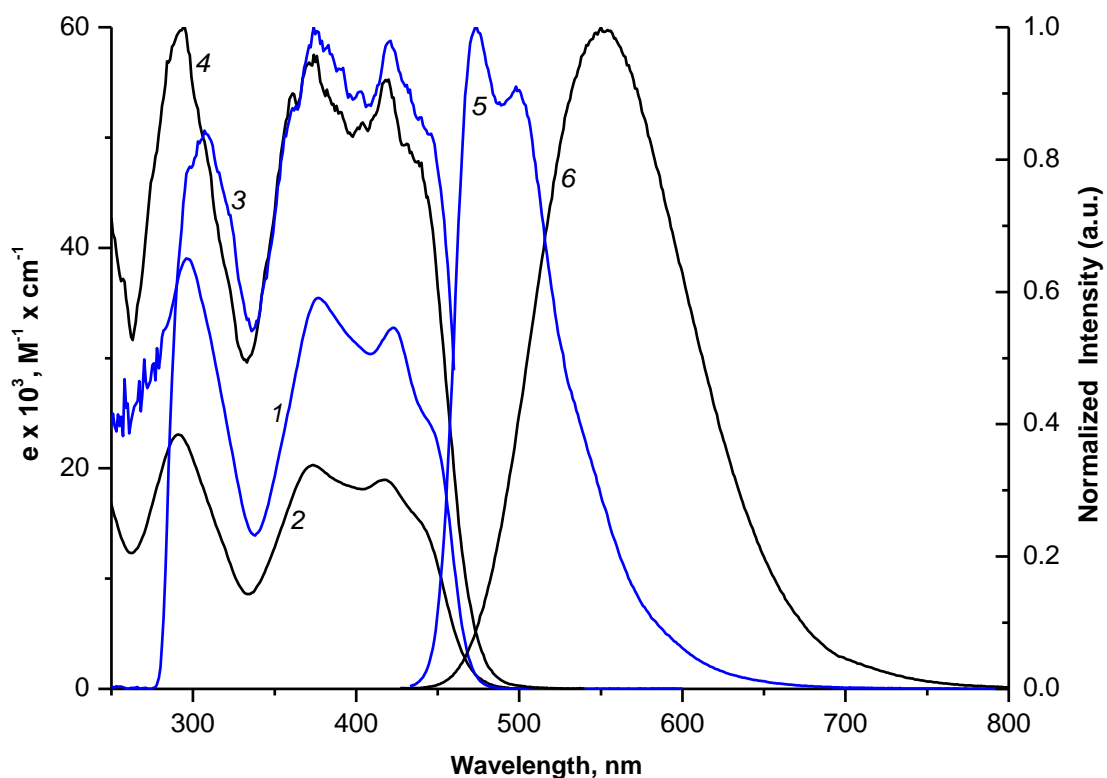

**Figure S21.** UV/Vis (1, 2), fluorescence excitation (3, 4) and fluorescence emission (5, 6) spectra of **5e** in toluene (1, 3, 5) and MeCN (2, 4, 6) at room temperature.

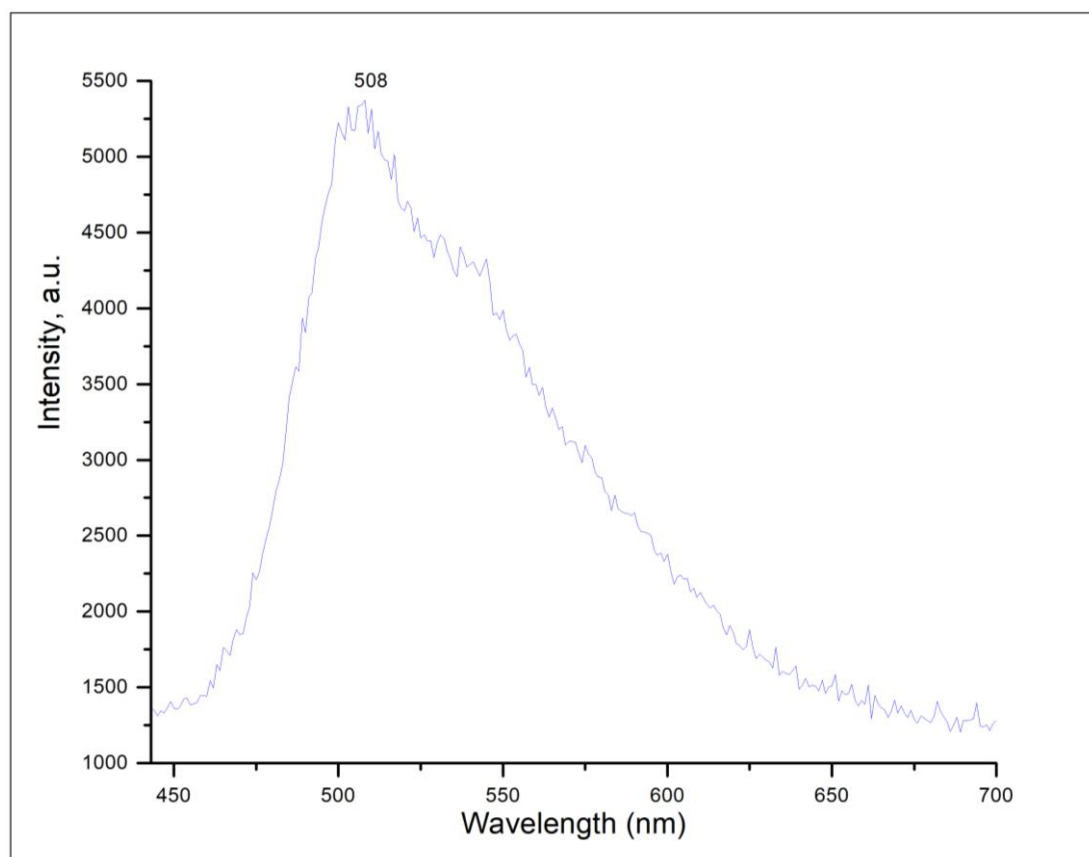

**Figure S22.** Fluorescence emission spectrum of **5e** in solid state at room temperature.

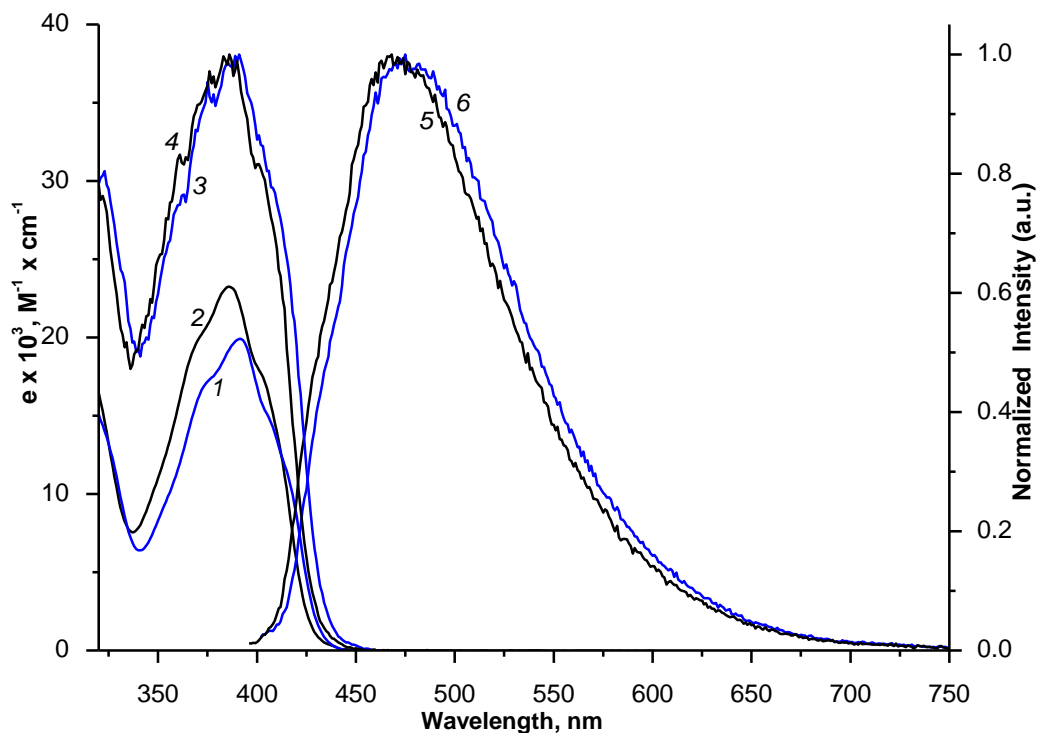

**Figure S23.** UV/Vis (1, 2), fluorescence excitation (3, 4) and fluorescence emission (5, 6) spectra of **5f** in toluene (1, 3, 5) and MeCN (2, 4, 6) at room temperature.

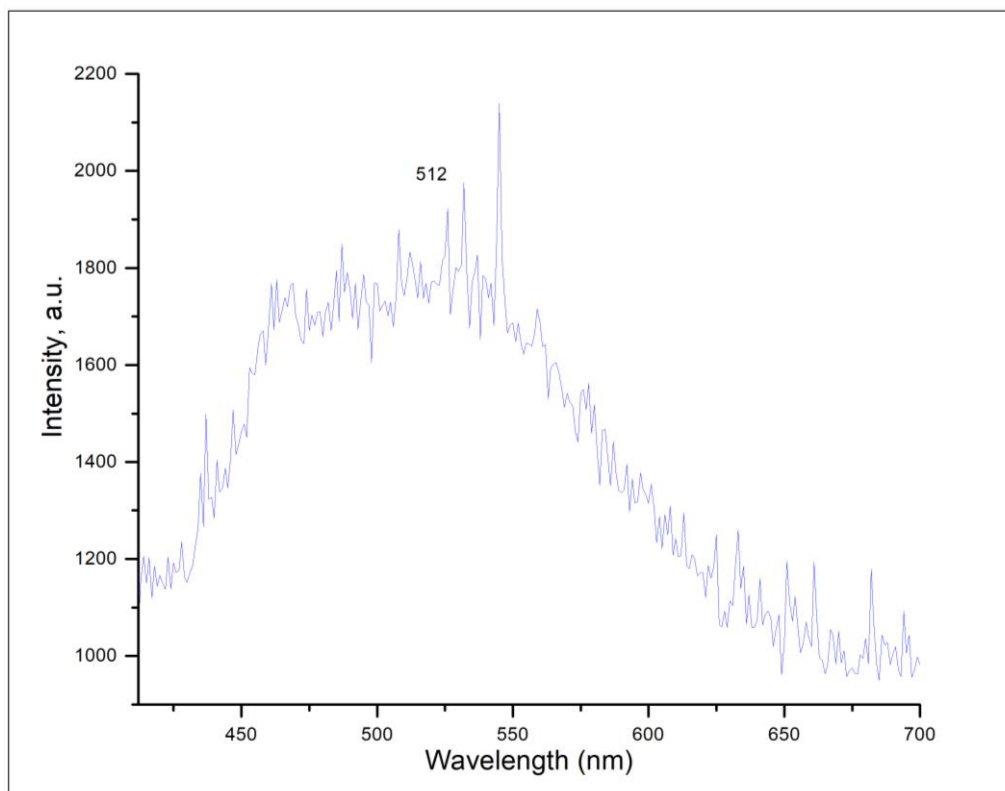

**Figure S24.** Fluorescence emission spectrum of **5f** in solid state at room temperature.

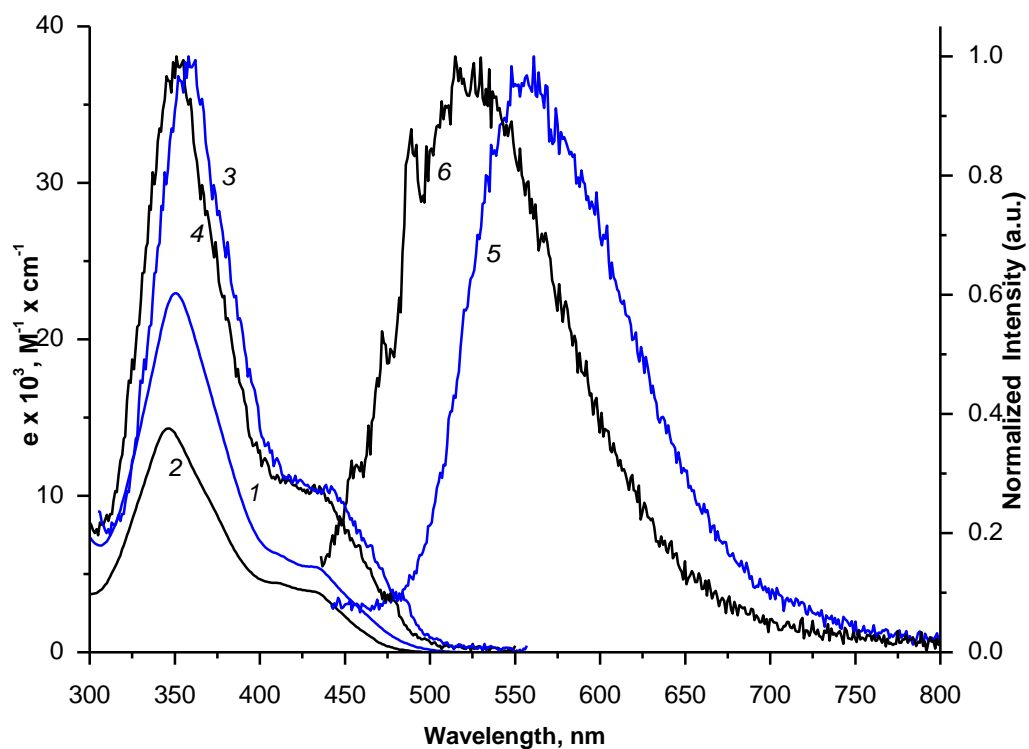

**Figure S25.** UV/Vis (1, 2), fluorescence excitation (3, 4) and fluorescence emission (5, 6) spectra of **7** in toluene (1, 3, 5) and MeCN (2, 4, 6) at room temperature.

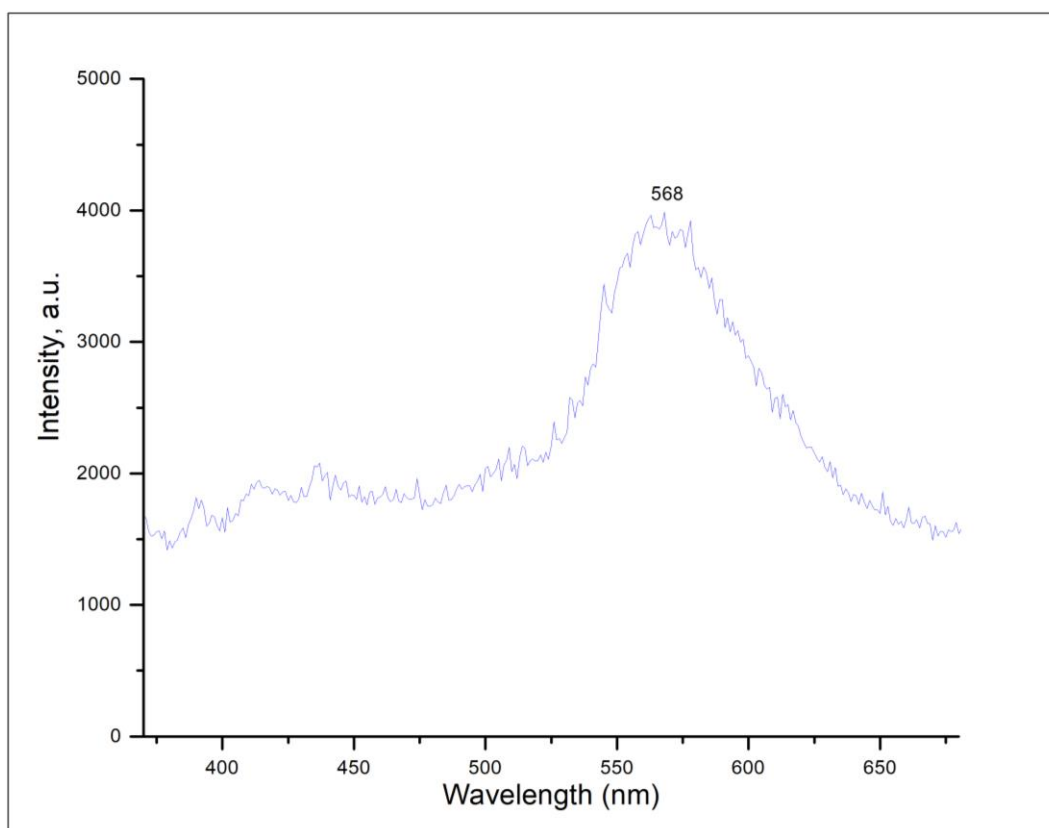

**Figure S26.** Fluorescence emission spectrum of **7** in solid state at room temperature.

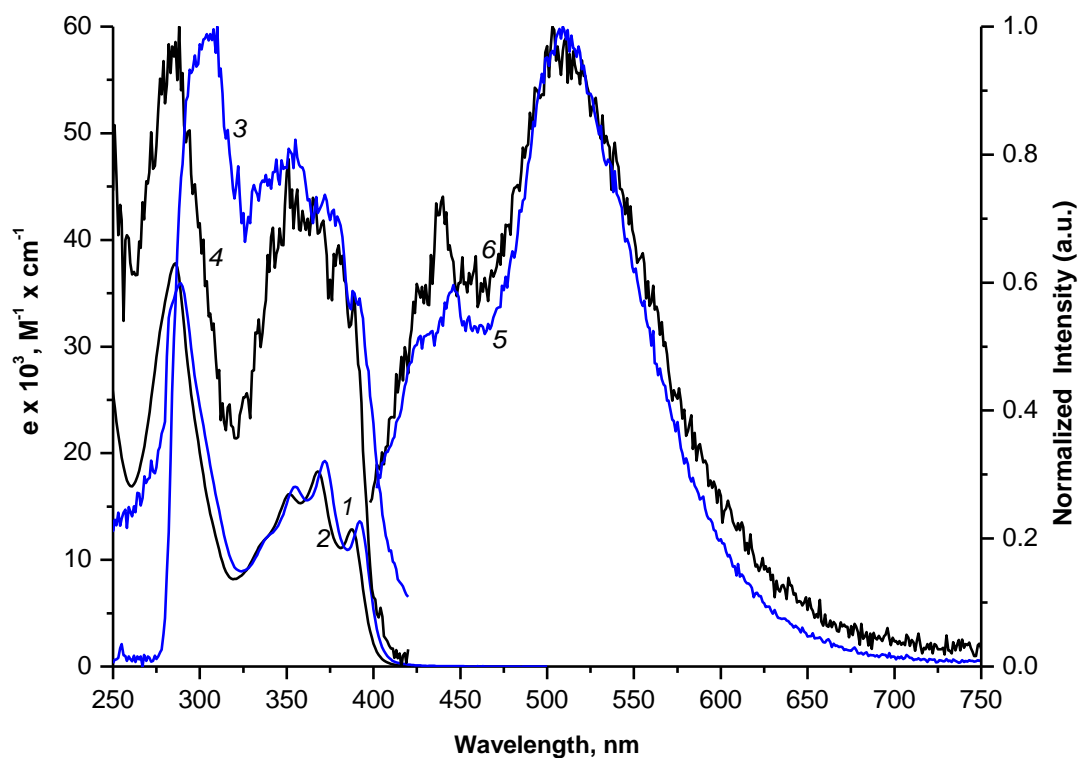

**Figure S27.** UV/Vis (1, 2), fluorescence excitation (3, 4) and fluorescence emission (5, 6) spectra of **8** in toluene (1, 3, 5) and MeCN (2, 4, 6) at room temperature.

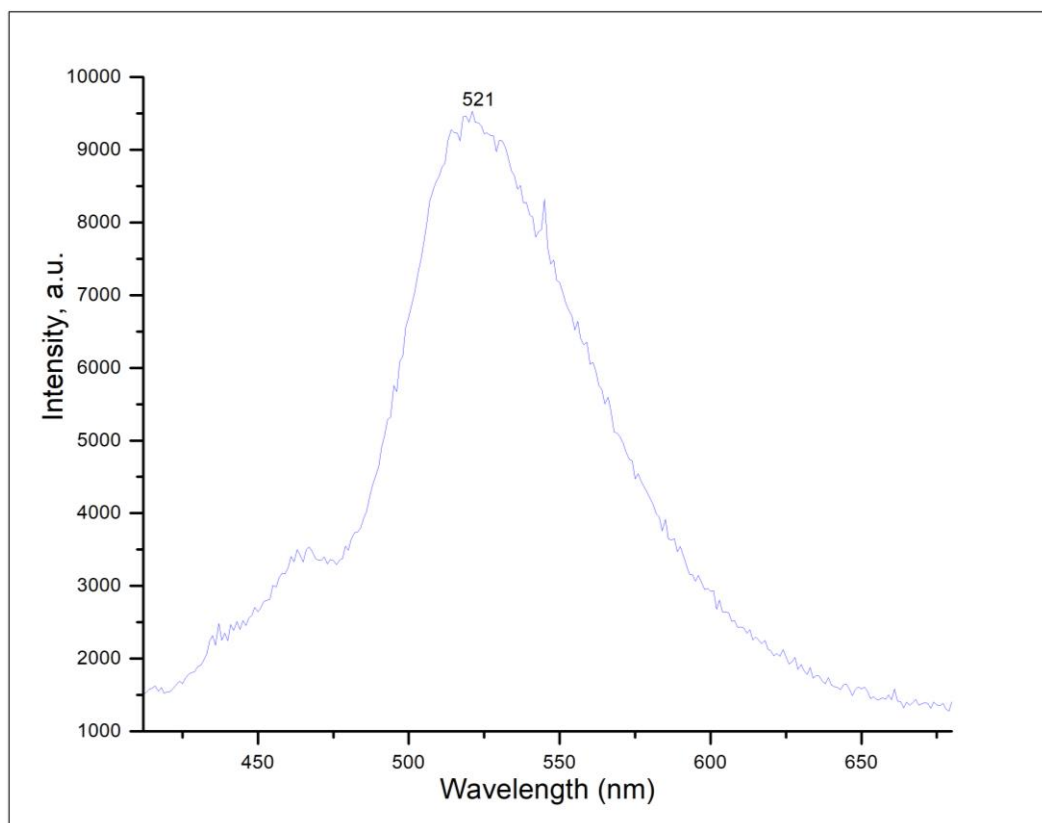

**Figure S28.** Fluorescence emission spectrum of **8** in solid state at room temperature.

**Table S1.**Optical properties of compounds **5a-f**, **7**, **8** in solid state (powder).

| Compound  | Emission,<br>$\lambda_{\max}$ (nm) | $\Phi_F^a$ , % |
|-----------|------------------------------------|----------------|
| <b>5a</b> | 493                                | 3.0            |
| <b>5b</b> | 506                                | < 1            |
| <b>5c</b> | 476                                | 4.2            |
| <b>5d</b> | 501                                | 2.3            |
| <b>5e</b> | 508                                | 1.6            |
| <b>5f</b> | 512                                | < 1            |
| <b>7</b>  | 568                                | < 1            |
| <b>8</b>  | 521                                | 3.8            |

<sup>a</sup>Quantum yield in solid state was measured by the integrated sphere method.



#### 4. Aggregation-induced emission of compounds 5a-f, 7, 8

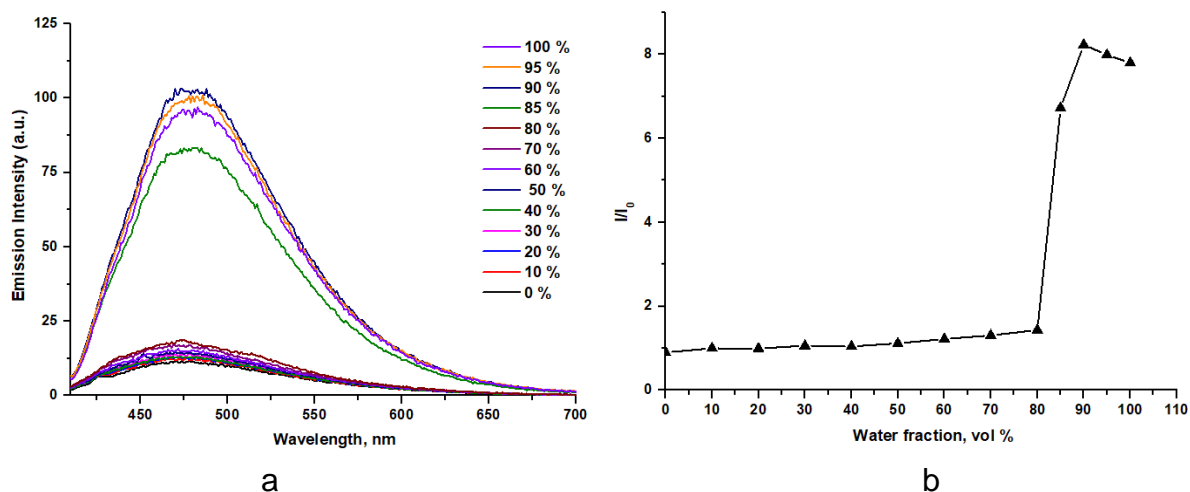

**Figure S29.** (a) Fluorescence spectra of 10  $\mu$ M **5a** in the MeCN/H<sub>2</sub>O mixtures with different water fractions ( $f_w$ ). (b) Plot of the  $I/I_0$  at 480 nm versus the composition of the MeCN/H<sub>2</sub>O mixture for **5a** ( $E_{ex} = 378$  nm).

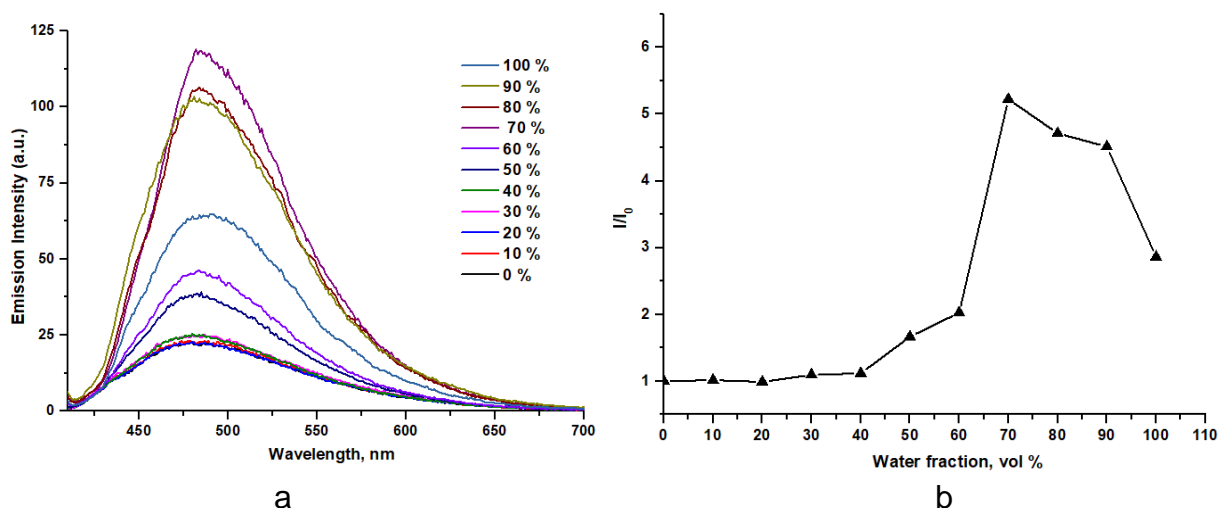

**Figure S30.** (a) Fluorescence spectra of 10  $\mu$ M **5b** in the MeCN/H<sub>2</sub>O mixtures with different water fractions ( $f_w$ ). (b) Plot of the  $I/I_0$  at 485 nm versus the composition of the MeCN/H<sub>2</sub>O mixture for **5b** ( $E_{ex} = 385$  nm).

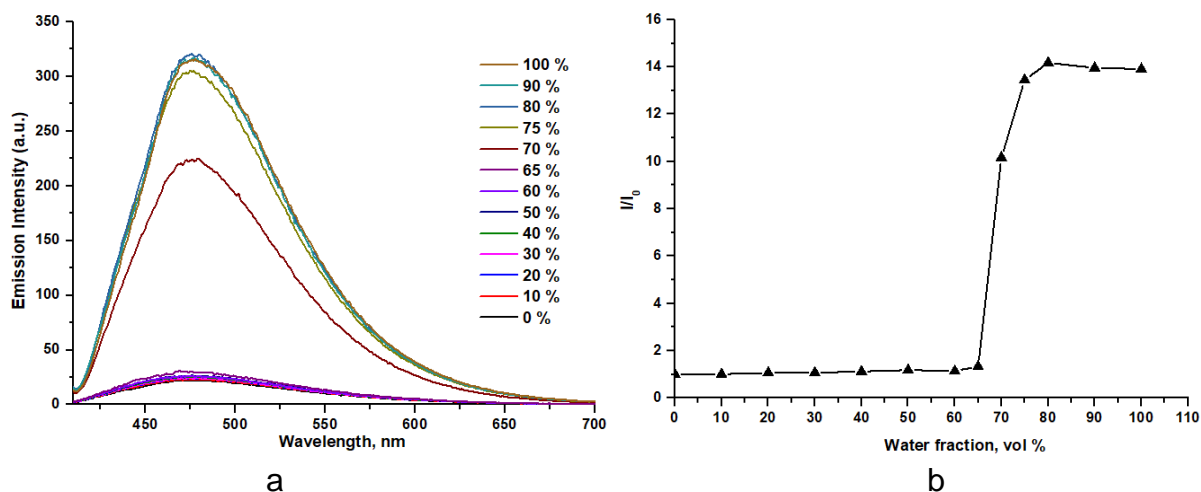

**Figure S31.** (a) Fluorescence spectra of 10  $\mu\text{M}$  **5c** in the MeCN/H<sub>2</sub>O mixtures with different water fractions ( $f_w$ ). (b) Plot of the  $I/I_0$  at 475 nm versus the composition of the MeCN/H<sub>2</sub>O mixture for **5c** ( $E_{\text{ex}} = 385$  nm).

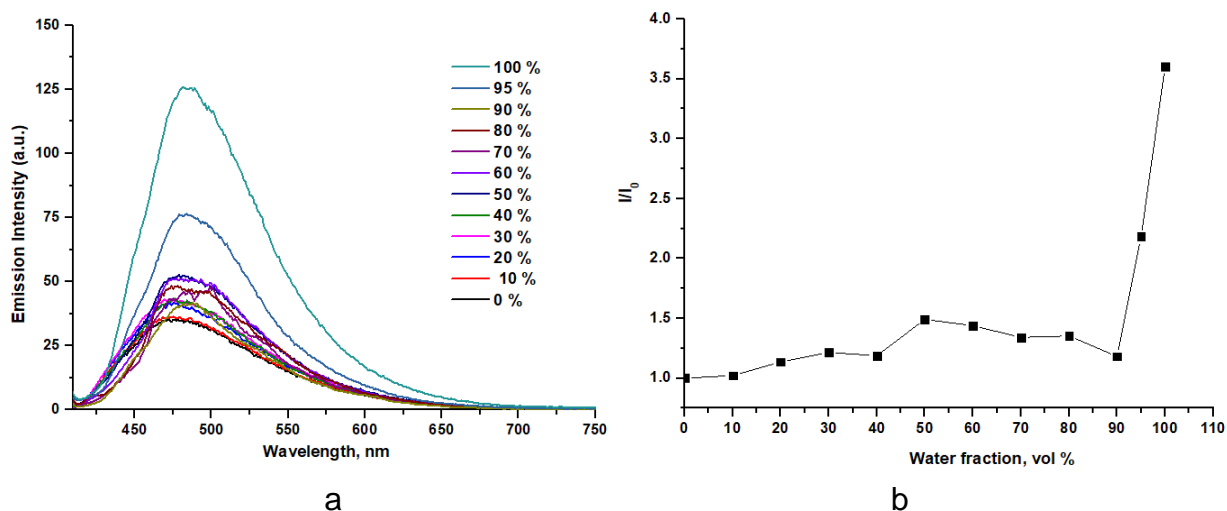

**Figure S32.** (a) Fluorescence spectra of 10  $\mu\text{M}$  **5d** in the MeCN/H<sub>2</sub>O mixtures with different water fractions ( $f_w$ ). (b) Plot of the  $I/I_0$  at 485 nm versus the composition of the MeCN/H<sub>2</sub>O mixture for **5d** ( $E_{\text{ex}} = 390$  nm).

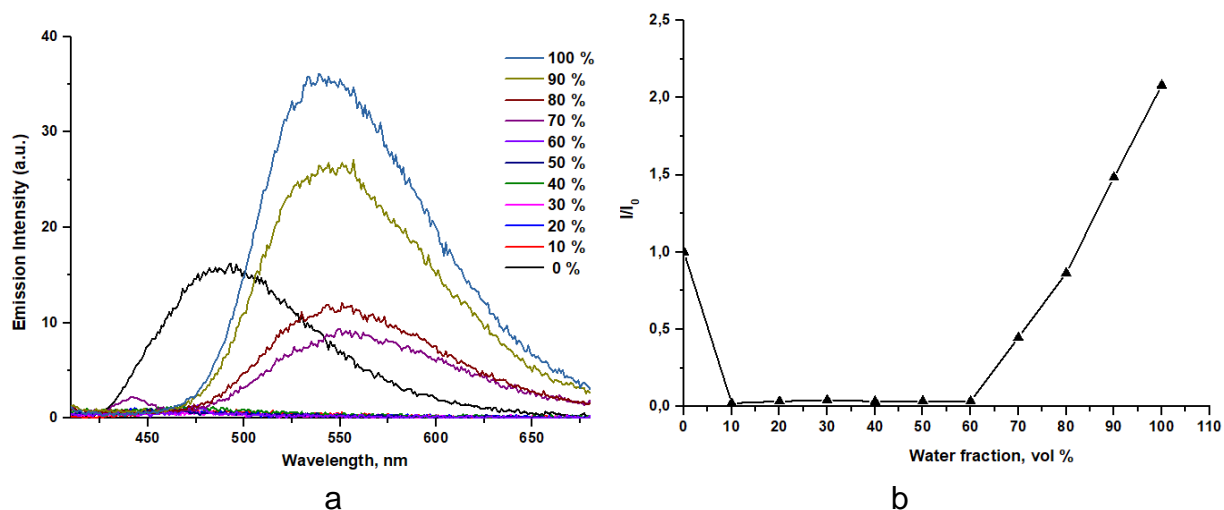

**Figure S33.** (a) Fluorescence spectra of 10  $\mu$ M **7** in the MeCN/H<sub>2</sub>O mixtures with different water fractions ( $f_w$ ). (b) Plot of the  $I/I_0$  at 540 nm versus the composition of the MeCN/H<sub>2</sub>O mixture for **7** ( $E_{ex} = 350$  nm).

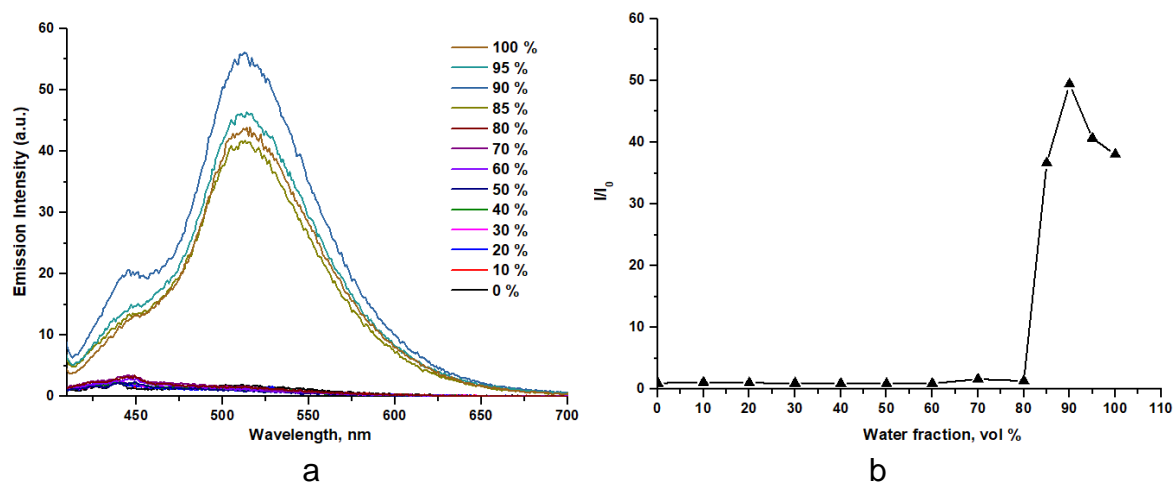

**Figure S34.** (a) Fluorescence spectra of 10  $\mu$ M **8** in the MeCN/H<sub>2</sub>O mixtures with different water fractions ( $f_w$ ). (b) Plot of the  $I/I_0$  at 510 nm versus the composition of the MeCN/H<sub>2</sub>O mixture for **8** ( $E_{ex} = 388$  nm).

## 5. Fe<sup>3+</sup> cation detection of compounds 5a-d,f and 7

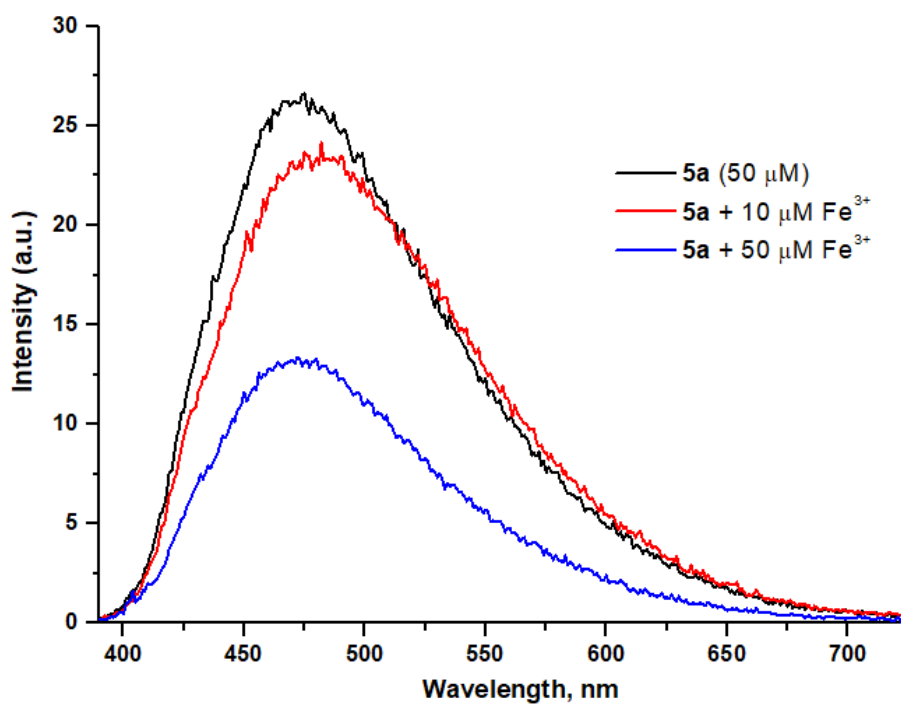

**Figure S35.** Fluorescence emission spectra ( $\lambda_{\text{exc}} = 380 \text{ nm}$ ) of **5a** acetone solvent with different concentration of Fe<sup>3+</sup>.

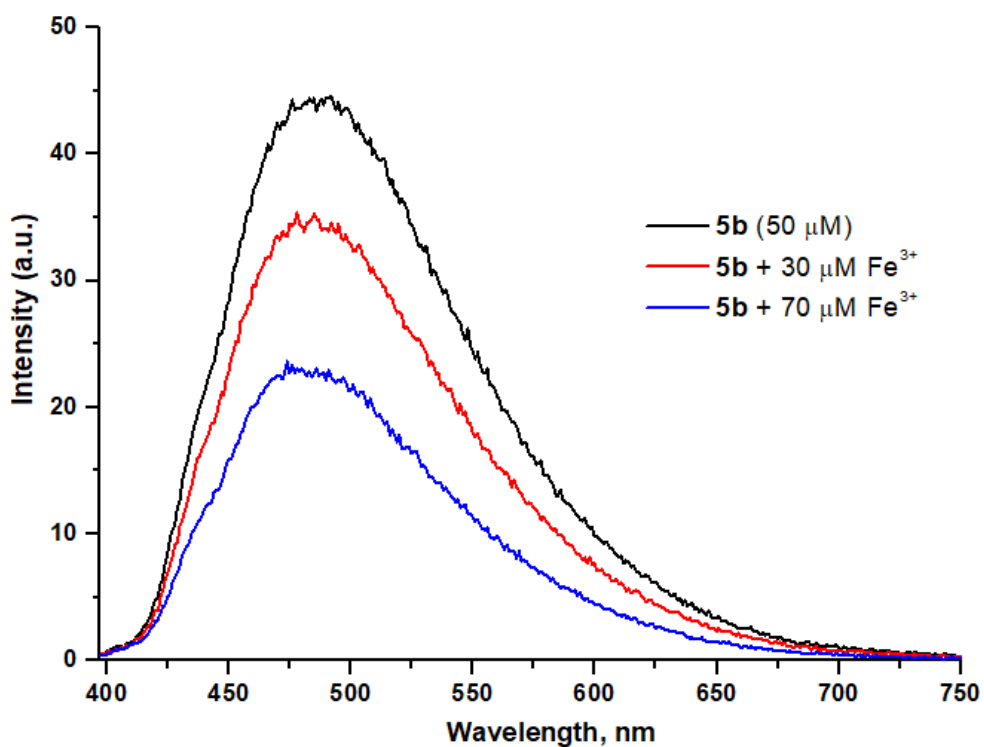

**Figure S36.** Fluorescence emission spectra ( $\lambda_{\text{exc}} = 387 \text{ nm}$ ) of **5b** acetone solvent with different concentration of Fe<sup>3+</sup>.

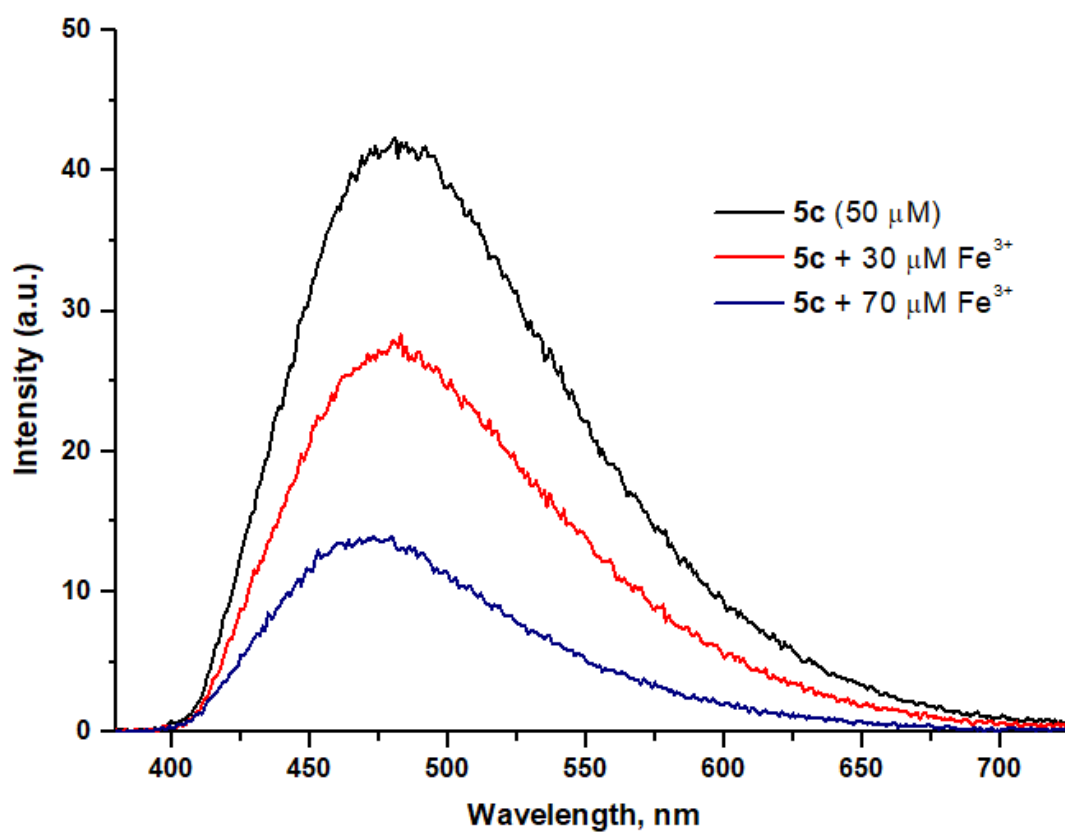

**Figure S37.** Fluorescence emission spectra ( $\lambda_{\text{exc}} = 385 \text{ nm}$ ) of **5c** acetone solvent with different concentration of  $\text{Fe}^{3+}$ .

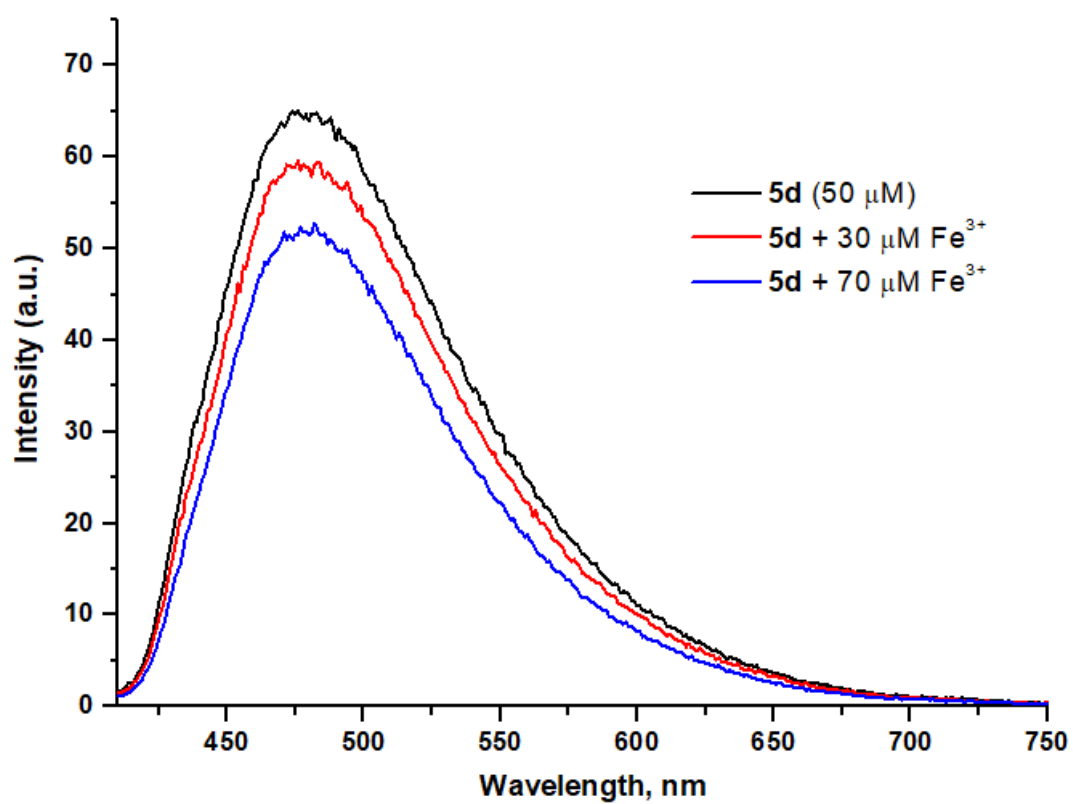

**Figure S38.** Fluorescence emission spectra ( $\lambda_{\text{exc}} = 396 \text{ nm}$ ) of **5d** acetone solvent with different concentration of  $\text{Fe}^{3+}$ .

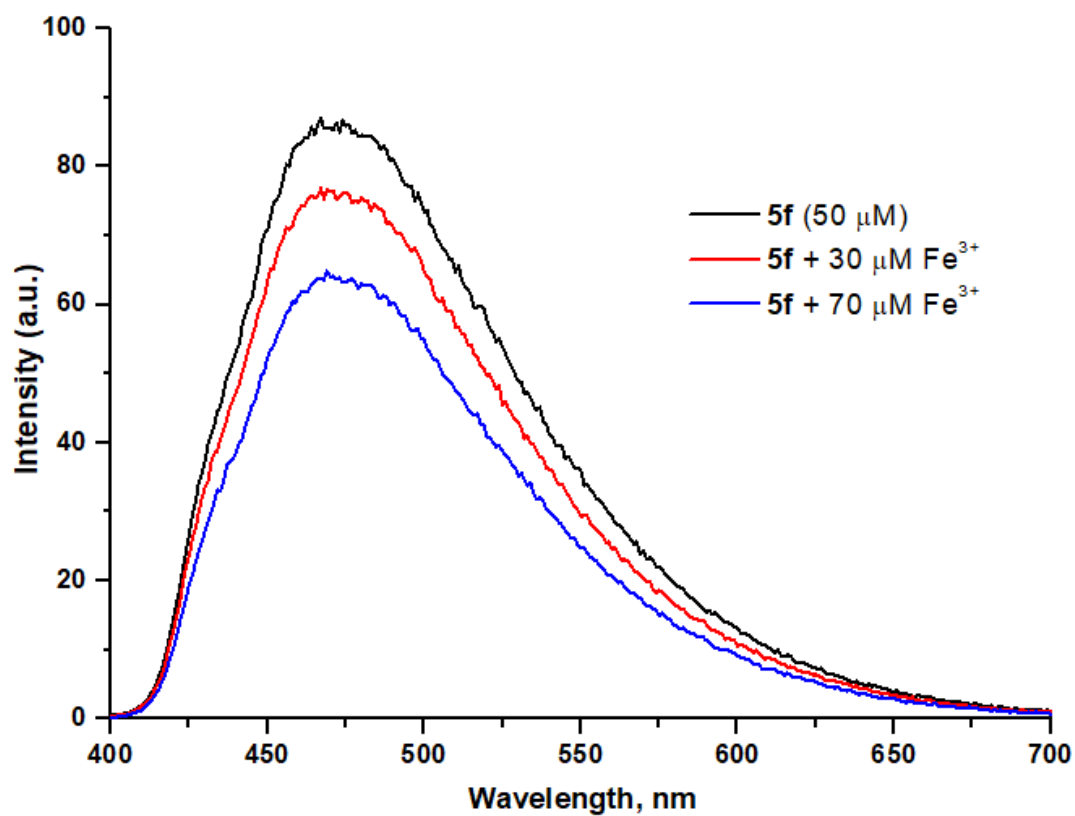

**Figure S39.** Fluorescence emission spectra ( $\lambda_{\text{ex}} = 390 \text{ nm}$ ) of **5f** acetone solvent with different concentration of  $\text{Fe}^{3+}$ .

## 6. Selected bond lengths and angles of compounds 5a,b, and 7

**Table S2**

Selected bond lengths of compound **5a**.

| Bond        | Bond length (Å) | Bond        | Bond length (Å) |
|-------------|-----------------|-------------|-----------------|
| S(1)-C(13)  | 1.715(4)        | C(10)-C(16) | 1.487(5)        |
| S(1)-C(14)  | 1.722(4)        | C(11)-C(14) | 1.363(5)        |
| N(1)-C(15)  | 1.303(4)        | C(11)-C(12) | 1.428(5)        |
| N(1)-C(1)   | 1.377(5)        | C(12)-C(13) | 1.346(5)        |
| O(1)-C(7)   | 1.211(4)        | C(14)-C(15) | 1.429(5)        |
| C(1)-C(2)   | 1.398(5)        | C(16)-C(21) | 1.379(5)        |
| C(1)-C(6)   | 1.402(5)        | C(16)-C(17) | 1.390(5)        |
| N(2)-C(15)  | 1.422(4)        | C(17)-C(18) | 1.371(6)        |
| N(2)-C(9)   | 1.434(4)        | C(18)-C(19) | 1.382(6)        |
| N(2)-C(7)   | 1.448(5)        | C(19)-C(20) | 1.359(6)        |
| C(2)-C(3)   | 1.370(6)        | C(20)-C(21) | 1.375(5)        |
| C(3)-C(4)   | 1.396(6)        | C(22)-C(23) | 1.383(5)        |
| C(4)-C(5)   | 1.368(5)        | C(22)-C(27) | 1.386(5)        |
| C(5)-C(6)   | 1.396(5)        | C(23)-C(24) | 1.385(5)        |
| C(6)-C(7)   | 1.459(5)        | C(24)-C(25) | 1.366(6)        |
| C(9)-C(10)  | 1.352(5)        | C(25)-C(26) | 1.380(6)        |
| C(9)-C(22)  | 1.496(5)        | C(26)-C(27) | 1.377(5)        |
| C(10)-C(11) | 1.446(5)        |             |                 |

**Table S3**Selected bond angles of compound **5a**.

| Angle             | (°)       | Angle             | (°)      |
|-------------------|-----------|-------------------|----------|
| C(13)-S(1)-C(14)  | 90.48(19) | C(12)-C(11)-C(10) | 129.2(3) |
| C(15)-N(1)-C(1)   | 118.4(3)  | C(13)-C(12)-C(11) | 112.4(4) |
| N(1)-C(1)-C(2)    | 119.4(3)  | C(12)-C(14)-S(1)  | 113.0(3) |
| N(1)-C(1)-C(6)    | 121.7(3)  | C(11)-C(14)-C(15) | 123.8(3) |
| C(2)-C(1)-C(6)    | 118.9(4)  | C(11)-C(14)-S(1)  | 112.6(3) |
| C(15)-N(2)-C(9)   | 121.1(3)  | C(15)-C(14)-S(1)  | 123.6(3) |
| C(15)-N(2)-C(7)   | 117.6(3)  | N(1)-C(15)-N(2)   | 125.4(3) |
| C(9)-N(2)-C(7)    | 121.0(3)  | N(1)-C(15)-C(14)  | 119.3(3) |
| C(3)-C(2)-C(1)    | 120.0(4)  | N(2)-C(15)-C(14)  | 115.2(3) |
| C(2)-C(3)-C(4)    | 120.8(4)  | C(21)-C(16)-C(17) | 118.4(4) |
| C(5)-C(4)-C(3)    | 120.0(4)  | C(21)-C(16)-C(10) | 120.0(3) |
| C(4)-C(5)-C(6)    | 119.9(4)  | C(17)-C(16)-C(10) | 121.5(3) |
| C(5)-C(6)-C(1)    | 120.3(4)  | C(18)-C(17)-C(16) | 120.3(4) |
| C(5)-C(6)-C(7)    | 119.3(3)  | C(17)-C(18)-C(19) | 120.1(4) |
| C(1)-C(6)-C(7)    | 120.4(3)  | C(20)-C(19)-C(18) | 120.2(4) |
| O(1)-C(7)-N(2)    | 121.0(3)  | C(19)-C(20)-C(21) | 119.9(4) |
| O(1)-C(7)-C(6)    | 124.5(4)  | C(20)-C(21)-C(16) | 121.1(4) |
| N(2)-C(7)-C(6)    | 114.6(3)  | C(23)-C(22)-C(27) | 118.2(3) |
| C(10)-C(9)-N(2)   | 120.9(3)  | C(23)-C(22)-C(9)  | 121.8(3) |
| C(10)-C(9)-C(22)  | 119.7(3)  | C(27)-C(22)-C(9)  | 119.8(3) |
| N(2)-C(9)-C(22)   | 119.3(3)  | C(22)-C(23)-C(24) | 120.8(4) |
| C(9)-C(10)-C(11)  | 119.4(3)  | C(25)-C(24)-C(23) | 119.9(4) |
| C(9)-C(10)-C(16)  | 123.8(3)  | C(24)-C(25)-C(26) | 120.3(4) |
| C(11)-C(10)-C(16) | 116.7(3)  | C(27)-C(26)-C(25) | 119.5(4) |



|                   |          |                   |          |
|-------------------|----------|-------------------|----------|
| C(14)-C(11)-C(12) | 111.5(3) | C(26)-C(27)-C(22) | 121.2(4) |
| C(14)-C(11)-C(10) | 119.3(3) |                   |          |

**Table S4**

Selected bond lengths of compound **5b**.

| Bond        | Bond length (Å) | Bond        | Bond length (Å) |
|-------------|-----------------|-------------|-----------------|
| Br(1)-C(2)  | 1.878(7)        | C(13)-C(12) | 1.413(9)        |
| S(1)-C(2)   | 1.719(7)        | C(22)-C(27) | 1.386(6)        |
| S(1)-C(15)  | 1.728(6)        | C(22)-C(23) | 1.390(8)        |
| O(1)-C(7)   | 1.208(8)        | C(4)-C(3)   | 1.433(9)        |
| C(1)-C(3)   | 1.353(9)        | C(4)-C(5)   | 1.454(8)        |
| N(2)-C(14)  | 1.403(7)        | C(27)-C(26) | 1.385(8)        |
| N(2)-C(6)   | 1.444(8)        | C(26)-C(25) | 1.369(8)        |
| N(2)-C(7)   | 1.431(8)        | C(24)-C(23) | 1.38(1)         |
| N(1)-C(14)  | 1.315(7)        | C(24)-C(25) | 1.354(7)        |
| N(1)-C(13)  | 1.375(8)        | C(8)-C(7)   | 1.468(9)        |
| C(15)-C(14) | 1.419(8)        | C(8)-C(9)   | 1.39(1)         |
| C(15)-C(4)  | 1.371(8)        | C(17)-C(18) | 1.41(1)         |
| C(16)-C(5)  | 1.466(9)        | C(21)-C(20) | 1.37(1)         |
| C(16)-C(17) | 1.379(8)        | C(12)-C(11) | 1.37(1)         |
| C(16)-C(21) | 1.414(8)        | C(9)-C(10)  | 1.35(1)         |
| C(6)-C(22)  | 1.492(8)        | C(18)-C(19) | 1.364(9)        |
| C(6)-C(5)   | 1.359(8)        | C(20)-C(19) | 1.37(1)         |
| C(13)-C(8)  | 1.40(1)         | C(10)-C(11) | 1.37(1)         |

**Table S5**Selected bond angles of compound **5b**.

| Angle             | (°)      | Angle             | (°)      |
|-------------------|----------|-------------------|----------|
| C(2)-S(1)-C(15)   | 89.5(3)  | C(15)-C(4)-C(5)   | 118.1(5) |
| Br(1)-C(2)-S(1)   | 118.9(3) | C(3)-C(4)-C(5)    | 129.6(5) |
| Br(1)-C(2)-C(3)   | 126.3(5) | C(22)-C(27)-C(26) | 120.9(5) |
| S(1)-C(2)-C(3)    | 114.8(5) | C(27)-C(26)-C(25) | 119.1(5) |
| C(14)-N(2)-C(6)   | 121.2(4) | C(2)-C(3)-C(4)    | 110.6(5) |
| C(14)-N(2)-C(7)   | 118.5(4) | C(23)-C(24)-C(25) | 120.5(6) |
| C(6)-N(2)-C(7)    | 120.0(4) | C(22)-C(23)-C(24) | 120.3(6) |
| C(14)-N(1)-C(13)  | 117.6(5) | C(16)-C(5)-C(6)   | 122.1(5) |
| S(1)-C(15)-C(14)  | 122.6(4) | C(16)-C(5)-C(4)   | 118.5(5) |
| S(1)-C(15)-C(4)   | 112.8(4) | C(6)-C(5)-C(4)    | 119.3(5) |
| C(14)-C(15)-C(4)  | 124.6(5) | C(13)-C(8)-C(7)   | 119.1(6) |
| C(5)-C(16)-C(17)  | 121.0(5) | C(13)-C(8)-C(9)   | 119.5(6) |
| C(5)-C(16)-C(21)  | 122.0(5) | C(7)-C(8)-C(9)    | 121.3(6) |
| C(17)-C(16)-C(21) | 117.0(5) | C(16)-C(17)-C(18) | 121.4(6) |
| N(2)-C(14)-N(1)   | 125.0(4) | C(16)-C(21)-C(20) | 121.2(6) |
| N(2)-C(14)-C(15)  | 115.5(4) | C(13)-C(12)-C(11) | 120.3(6) |
| N(1)-C(14)-C(15)  | 119.5(5) | O(1)-C(7)-N(2)    | 122.2(5) |
| N(2)-C(6)-C(22)   | 119.8(5) | O(1)-C(7)-C(8)    | 123.0(6) |
| N(2)-C(6)-C(5)    | 120.6(5) | N(2)-C(7)-C(8)    | 114.7(5) |
| C(22)-C(6)-C(5)   | 119.5(5) | C(8)-C(9)-C(10)   | 120.5(6) |
| N(1)-C(13)-C(8)   | 122.9(5) | C(17)-C(18)-C(19) | 119.5(6) |
| N(1)-C(13)-C(12)  | 118.5(5) | C(26)-C(25)-C(24) | 120.9(6) |
| C(8)-C(13)-C(12)  | 118.6(5) | C(21)-C(20)-C(19) | 120.5(6) |
| C(6)-C(22)-C(27)  | 118.5(5) | C(9)-C(10)-C(11)  | 121.2(7) |

|                   |          |                   |          |
|-------------------|----------|-------------------|----------|
| C(6)-C(22)-C(23)  | 123.2(5) | C(12)-C(11)-C(10) | 119.9(7) |
| C(27)-C(22)-C(23) | 118.2(5) | C(18)-C(19)-C(20) | 120.4(7) |
| C(15)-C(4)-C(3)   | 112.2(5) |                   |          |

**Table S6**

Selected bond lengths of compound 7.

| Bond         | Bond length (Å) | Bond        | Bond length (Å) |
|--------------|-----------------|-------------|-----------------|
| F(1)-C(8)    | 1.305(7)        | C(11)-C(18) | 1.394(5)        |
| F(2)-C(8)    | 1.308(6)        | C(12)-C(31) | 1.495(6)        |
| F(3)-C(8)    | 1.313(8)        | C(13)-C(23) | 1.367(5)        |
| F(4)-C(12)   | 1.299(7)        | C(13)-C(27) | 1.389(5)        |
| F(5)-C(12)   | 1.300(6)        | C(14)-C(15) | 1.507(5)        |
| F(6)-C(12)   | 1.335(7)        | C(15)-C(25) | 1.362(5)        |
| N(1)-C(14)   | 1.397(4)        | C(15)-C(36) | 1.367(5)        |
| N(1)-C(3)    | 1.414(4)        | C(16)-C(39) | 1.375(5)        |
| N(1)-C(11)   | 1.433(5)        | C(16)-C(28) | 1.387(5)        |
| N(2)-C(3)    | 1.314(4)        | C(17)-C(21) | 1.398(5)        |
| N(2)-C(6)    | 1.379(4)        | C(18)-C(30) | 1.390(6)        |
| O(1)-C(24)   | 1.180(5)        | C(18)-C(24) | 1.487(6)        |
| O(2)-C(24)   | 1.369(4)        | C(19)-C(45) | 1.365(5)        |
| O(2)-C(31)   | 1.410(5)        | C(20)-C(21) | 1.360(6)        |
| C(31)-H(31A) | 0.9800          | C(22)-C(33) | 1.373(7)        |
| C(1)-C(19)   | 1.348(6)        | C(23)-C(32) | 1.370(5)        |
| C(1)-C(2)    | 1.402(7)        | C(25)-C(43) | 1.375(6)        |
| C(2)-C(40)   | 1.369(8)        | C(27)-C(35) | 1.376(6)        |
| C(3)-C(5)    | 1.409(5)        | C(28)-C(34) | 1.388(5)        |
| C(4)-C(20)   | 1.407(6)        | C(29)-C(44) | 1.330(7)        |

|             |          |             |          |
|-------------|----------|-------------|----------|
| C(4)-C(7)   | 1.424(5) | C(29)-C(36) | 1.382(6) |
| C(4)-C(5)   | 1.425(5) | C(30)-C(37) | 1.371(6) |
| C(5)-C(10)  | 1.425(5) | C(32)-C(41) | 1.350(6) |
| C(6)-C(7)   | 1.360(6) | C(33)-C(37) | 1.366(6) |
| C(6)-C(19)  | 1.491(5) | C(34)-C(42) | 1.343(6) |
| C(7)-C(16)  | 1.514(5) | C(35)-C(41) | 1.375(6) |
| C(8)-C(31)  | 1.509(6) | C(38)-C(42) | 1.374(6) |
| C(9)-C(14)  | 1.334(5) | C(38)-C(39) | 1.392(5) |
| C(9)-C(10)  | 1.460(5) | C(40)-C(26) | 1.326(7) |
| C(9)-C(13)  | 1.488(5) | C(43)-C(44) | 1.346(7) |
| C(10)-C(17) | 1.386(6) | C(45)-C(26) | 1.372(7) |
| C(11)-C(22) | 1.375(6) |             |          |

**Table S7**

Selected bond angles of compound **7**.

| Angle            | (°)      | Angle             | (°)      |
|------------------|----------|-------------------|----------|
| C(14)-N(1)-C(3)  | 120.5(3) | C(9)-C(14)-N(1)   | 122.8(3) |
| C(14)-N(1)-C(11) | 121.3(3) | C(9)-C(14)-C(15)  | 122.3(3) |
| C(13)-N(1)-C(11) | 117.8(3) | N(1)-C(14)-C(15)  | 114.8(4) |
| C(3)-N(2)-C(6)   | 117.0(4) | C(25)-C(15)-C(36) | 118.1(4) |
| C(24)-O(2)-C(31) | 116.6(4) | C(25)-C(15)-C(14) | 119.7(3) |
| C(19)-C(1)-C(2)  | 119.8(5) | C(36)-C(15)-C(14) | 122.2(4) |
| C(40)-C(2)-C(1)  | 120.2(6) | C(39)-C(16)-C(28) | 117.7(3) |
| N(2)-C(3)-C(5)   | 124.9(3) | C(39)-C(16)-C(7)  | 122.7(3) |
| N(2)-C(3)-N(1)   | 117.1(4) | C(28)-C(16)-C(7)  | 119.6(3) |
| C(5)-C(3)-N(1)   | 118.0(3) | C(10)-C(17)-C(21) | 119.5(4) |
| C(20)-C(4)-C(7)  | 125.8(3) | C(30)-C(18)-C(11) | 118.4(4) |

|                   |          |                   |          |
|-------------------|----------|-------------------|----------|
| C(20)-C(4)-C(5)   | 116.7(4) | C(30)-C(18)-C(24) | 121.4(4) |
| C(7)-C(4)-C(5)    | 117.5(4) | C(11)-C(18)-C(24) | 120.2(4) |
| C(3)-C(5)-C(4)    | 117.5(3) | C(1)-C(19)-C(45)  | 119.0(4) |
| C(3)-C(5)-C(10)   | 121.2(3) | C(1)-C(19)-C(6)   | 120.2(4) |
| C(4)-C(5)-C(10)   | 121.2(4) | C(45)-C(19)-C(6)  | 120.8(4) |
| C(7)-C(6)-N(2)    | 123.9(3) | C(21)-C(20)-C(4)  | 121.9(4) |
| C(7)-C(6)-C(19)   | 122.5(3) | C(20)-C(21)-C(17) | 121.7(5) |
| N(2)-C(6)-C(19)   | 113.6(4) | C(33)-C(22)-C(11) | 120.9(5) |
| C(6)-C(7)-C(4)    | 119.1(3) | C(13)-C(23)-C(32) | 121.9(4) |
| C(6)-C(7)-C(16)   | 121.0(3) | O(1)-C(24)-O(2)   | 122.2(5) |
| C(4)-C(7)-C(16)   | 119.6(4) | O(1)-C(24)-C(18)  | 127.2(4) |
| F(1)-C(8)-F(2)    | 108.1(6) | O(2)-C(24)-C(18)  | 110.6(4) |
| F(1)-C(8)-F(3)    | 107.9(5) | C(15)-C(25)-C(43) | 120.4(4) |
| F(2)-C(8)-F(3)    | 108.1(6) | C(35)-C(27)-C(13) | 120.8(4) |
| F(1)-C(8)-C(31)   | 111.0(6) | C(16)-C(28)-C(34) | 120.2(4) |
| F(2)-C(8)-C(31)   | 109.8(5) | C(44)-C(29)-C(36) | 121.8(5) |
| F(3)-C(8)-C(31)   | 111.9(5) | C(37)-C(30)-C(18) | 121.2(5) |
| C(14)-C(9)-C(10)  | 119.5(3) | O(2)-C(31)-C(12)  | 109.1(4) |
| C(14)-C(9)-C(13)  | 121.2(3) | O(2)-C(31)-C(8)   | 107.0(4) |
| C(10)-C(9)-C(13)  | 119.3(4) | C(12)-C(31)-C(8)  | 114.7(5) |
| C(17)-C(10)-C(5)  | 119.1(3) | C(41)-C(32)-C(23) | 120.6(5) |
| C(17)-C(10)-C(9)  | 123.0(4) | C(37)-C(33)-C(22) | 120.0(5) |
| C(5)-C(10)-C(9)   | 117.9(4) | C(42)-C(34)-C(28) | 121.6(4) |
| C(22)-C(11)-C(18) | 119.7(4) | C(41)-C(35)-C(27) | 120.2(4) |
| C(22)-C(11)-N(1)  | 117.9(4) | C(15)-C(36)-C(29) | 119.8(4) |
| C(18)-C(11)-N(1)  | 122.3(4) | C(33)-C(37)-C(30) | 119.9(5) |
| F(4)-C(12)-F(5)   | 107.3(6) | C(42)-C(38)-C(39) | 119.9(4) |

|                   |          |                   |          |
|-------------------|----------|-------------------|----------|
| F(4)-C(12)-F(6)   | 104.9(5) | C(16)-C(39)-C(38) | 121.3(4) |
| F(5)-C(12)-F(6)   | 107.2(6) | C(26)-C(40)-C(2)  | 118.7(6) |
| F(4)-C(12)-C(31)  | 113.9(6) | C(32)-C(41)-C(35) | 119.3(4) |
| F(5)-C(12)-C(31)  | 112.0(5) | C(34)-C(42)-C(38) | 119.3(4) |
| F(6)-C(12)-C(31)  | 111.0(5) | C(44)-C(43)-C(25) | 121.2(5) |
| C(23)-C(13)-C(27) | 117.3(4) | C(29)-C(44)-C(43) | 118.6(5) |
| C(23)-C(13)-C(9)  | 121.0(3) | C(19)-C(45)-C(26) | 120.4(5) |
| C(27)-C(13)-C(9)  | 121.7(4) | C(40)-C(26)-C(45) | 121.8(6) |

## 7. References

1. Borisevich NA, Zelinsky V V., Neporent BS. *Reports USSR Acad Sci.* 1954; XCIV: 37–39.
2. Dolomanov OV., Bourhis LJ, Gildea RJ, Howard JAK, Puschmann H. *J Appl Crystallogr.* 2009; 42: 339–341.
3. Sheldrick GM. *Acta Crystallogr Sect A Found Crystallogr.* 2008; 64: 112–122.
4. Abdel-Jalil RJ, Voelter W, Saeed M. *Tetrahedron Lett.* 2004; 45: 3475–3476.
5. Nosova EV., Moshkina TN, Lipunova GN, Baklanova IV., Kopchuk DS, Slepukhin PA, Charushin VN. *Mendeleev Commun.* 2018; 28: 14–16.
6. Layeva AA, Nosova EV., Lipunova GN, Trashakhova T V., Charushin VN. *Russ Chem Bull.* 2007; 56: 1821–1827.
7. Qi Z, Tang GD, Pan CL, Li X. *Org Biomol Chem.* 2015; 13: 10977–10980.
8. Kumaran S, Parthasarathy K. *European J Org Chem.* 2020; 2020: 866–869.
